# Supplementary material for: Using a single tablet daily to treat latent tuberculosis infection in Brazil: bioequivalence of two different isoniazid formulations (300 mg and 100 mg) demonstrated by a sensitive and rapid high-performance liquid chromatography-tandem mass spectrometry method in a randomised, crossover study
Source: PubMed Central journal article supplement — Mem Inst Oswaldo Cruz. 2015 Jun;110(4):543–50. doi: 10.1590/0074-02760140458 (PMC4501419; doi:10.1590/0074-02760140458), 2015-06
Supplement: 0074-0276-mioc-110-4-0543-suppl01.pdf [file 0074-0276-mioc-110-4-0543-suppl01.pdf]

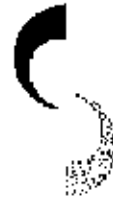

# Synchrophar

## PROTOCOLO DE ESTUDO DE BIOEQUIVALÊNCIA

---

Substância: Isoniazida  
Código Synchrophar: 029/08  
Código do SEFAR: 03.ISZ18-08DE.02  
Versão: Final  
Data: 30/09/2008

---

Título: "Estudo clínico de farmacocinética de duas formulações de Isoniazida em voluntários saudáveis de ambos os sexos: Isoniazida comprimido de 300mg (teste) produzido pelo Instituto de Tecnologia e Fármacos – Farmanguinhos e Isoniazida-LAQFA<sup>®</sup> 03 comprimidos de 100 mg (Referência) produzido pela Laboratório Químico Farmacêutico da Aeronáutica."

**Investigador Principal:** Dr. Eduardo Wernick Barroso CRM: 5241807-7

**Responsável pela Etapa** Ney Carter do Carmo Borges, M.D., Ph.D., FACC, FACP  
**Clinica:** CRM: 50.535/SP e Ronilson Agnaldo Moreno B.Sc.,  
M.Sc., Ph.D

**Responsável etapa analítica:** Dr<sup>a</sup>. Marlice Aparecida Siqueira Marques CRP: 5735

**Responsáveis etapa estatística** MSc. Luciana da Rocha Pitta

Synchrophar - Assessoria e Desenvolvimento de Projetos Clínicos S/S Ltda  
R: Engenheiro Cândido Gumide, 38 – Botafogo – CEP: 13.073-200 - Campinas-SP

| <b>CENTROS DE PESQUISA</b>                                                                                                                                                                      | <b>PATROCINADOR</b>                                                                                                                           |
|-------------------------------------------------------------------------------------------------------------------------------------------------------------------------------------------------|-----------------------------------------------------------------------------------------------------------------------------------------------|
| <p>Synchrophar - Assessoria e Desenvolvimento de Projetos Clínicos S/S Ltda<br/>Rua Engenheiro Cândido Gomide, 38 – Botafogo - 13.073-200<br/>Campinas - SP</p>                                 | <p>Instituto de Tecnologia em Fármacos - Farmanguinhos<br/>Av. Comandante Guaranys, 447<br/>Jacarepaguá - 22775-610<br/>Rio de Janeiro RJ</p> |
| <p>Serviço de Farmacocinética<br/>Instituto de Pesquisa Clínica Evandro Chagas - SEFAR<br/>Fundação Oswaldo Cruz<br/>Avenida Brasil, 4365 – Mangueiras<br/>CEP: 21040-360 Rio de Janeiro RJ</p> |                                                                                                                                               |

| <b>INVESTIGADOR PRINCIPAL</b>                        | <b>RESPONSÁVEIS PELA ETAPA CLÍNICA</b>                                                                                      |
|------------------------------------------------------|-----------------------------------------------------------------------------------------------------------------------------|
| <p>Dr. Eduardo Werneck Barroso<br/>CRM 5241807-7</p> | <p>Ney Carter do Carmo Borges M.D., Ph.D., FACC, FAC? - CRM: 50.535<br/><br/>Ronilson Agnaldo Moreno B.Sc., M.Sc., Ph.D</p> |

## TERMO DE COMPROMISSO

Dr. Eduardo Werneck Barroso, Pesquisador, Investigador  
Responsável do Protocolo de Pesquisa Intitulado: "Estudo clínico de farmacocinética de duas formulações de Isoniazida em voluntários saudáveis de ambos os sexos; Isoniazida – comprimido de 300 mg - Teste - produzido pelo Instituto de Tecnologia em Fármacos - Farmanguinhos e Isoniazida-LAQPA<sup>®</sup> - 03 comprimidos de 100 mg - Referência- produzido pelo Laboratório Laboratório Químico Farmacêutico da Aeronáutica" compromete-se a desenvolver a pesquisa supracitada conforme as diretrizes e normas de pesquisa envolvendo seres humanos das Resoluções nº 196/96 e 251/97 do Conselho Nacional de Saúde - Ministério da Saúde, das Boas Práticas Clínicas segundo o ICH e de acordo com a Declaração de Helsinki (1965) e as revisões de Tóquio (1975), Veneza (1983) e África do Sul (1996) e Escócia (2000). Compromete-se ainda a só utilizar os dados e os materiais biológicos obtidos para a realização das avaliações e relatórios referentes a esta pesquisa clínica.

Rio de Janeiro, 30 de Setembro de 2008.

---

Dr. Eduardo Werneck Barroso  
Investigador Responsável

## TERMO DE COMPROMISSO

O Instituto de Tecnologia em Fármacos - Farmanguinhos compromete-se a assumir responsabilidade, provendo suporte e compensação nos casos em que a saúde dos voluntários seja agravada em decorrência da participação dos mesmos no estudo: "Estado clínico de farmacocinética de duas formulações de Isoniazida em voluntários sadios de ambos os sexos: Isoniazida - comprimido de 300 mg - Teste - produzido pelo Instituto de Tecnologia em Fármacos - Farmanguinhos e Isoniazida-LAQFA\* - 03 comprimidos de 100 mg - Referência - produzido pelo Laboratório Químico Farmacêutico da Aeronáutica" desde que este estudo tenha sido realizado em conformidade com as Boas Práticas Clínicas. A obrigação de indenizar não se estenderá às hipóteses resultantes de negligência ou conduta inadequada intencional da CONTRATADA e/ou Investigador Principal ou de seus funcionários, agentes, sub-contratados ou filiações.

Rio de Janeiro, 30 de Setembro de 2008.

Dr. André Bastos Daher  
Monitor - Farmanguinhos

Estudo: SPH29/08\_Isoniazida  
Documento: Protocolo  
Versão: Final  
Data: 30 de Setembro de 2008

## TERMO DE COMPROMISSO

Dr. Ney Carter do Carmo Borges, responsável pela Etapa Clínica do Protocolo de Pesquisa Intitulado: "Estudo clínico de farmacocinética de duas formulações de Isoniazida em voluntários sadios de ambos os sexos: Isoniazida - comprimido de 100 mg - Teste - produzido pelo Instituto de Tecnologia em Fármacos - Farmanguinhos e Isoniazida-LAQFA® - 03 comprimidos de 100 mg - Referência- produzido pelo Laboratório Químico Farmacêutico da Aeronáutica" compromete-se a desenvolver a pesquisa supracitada conforme as diretrizes e normas de pesquisa envolvendo seres humanos das Resoluções nº 196/96 e 251/97 do Conselho Nacional de Saúde - Ministério da Saúde, das Boas Práticas Clínicas segundo o ICH e de acordo com a Declaração de Helsinkí (1964) e as revisões de Tóquio (1975), Veneza (1983) e África do Sul (1996) e Escócia (2000). Compromete-se ainda a só utilizar os dados e os materiais biológicos obtidos para a realização das avaliações e relatórios referentes a esta pesquisa clínica.

Campinas, 30 de Setembro de 2008.

Dr. Ney Carter do Carmo Borges  
Responsável pela Etapa Clínica

Estudo: SP1129/08\_isoniazida

Documento: Protocolo

Versão: Final

Data: 30 de Setembro de 2008

## TERMO DE COMPROMISSO

Dr. Ronilson Agnaldo Moreno, responsável pela Etapa Clínica do Protocolo de Pesquisa Intitulado: "Estudo clínico de farmacocinética de duas formulações de Isoniazida em voluntários sadios de ambos os sexos: Isoniazida – comprimido de 300 mg - Teste - produzido pelo Instituto de Tecnologia em Fármacos - Farmanguinhos e Isoniazida-LAQFA<sup>®</sup> - 03 comprimidos de 100 mg – Referência- produzido pelo Laboratório Químico Farmacêutico da Aeronáutica" compromete-se a desenvolver a pesquisa supracitada conforme as diretrizes e normas de pesquisa envolvendo seres humanos das Resoluções nº 196/96 e 251/97 do Conselho Nacional de Saúde - Ministério da Saúde, das Boas Práticas Clínicas segundo o ICH e de acordo com a Declaração de Helsinkí (1965) e as revisões de Tóquio (1975), Veneza (1983) e África do Sul (1996) e Escócia (2000). Compromete-se ainda a só utilizar os dados e os materiais biológicos obtidos para a realização das avaliações e relatórios referentes a esta pesquisa clínica.

Campinas, 30 de Setembro de 2008.

Dr. ~~Ronilson Agnaldo Moreno~~  
Responsável pela Etapa Clínica

Estudo: SPI029/08 - Isoniazida

Documento: Protocolo

Versão: Final

Data: 30 de Setembro de 2008

## TERMO DE COMPROMISSO

Drª. Marlice A Sipali Marques, responsável pela etapa analítica do protocolo de pesquisa intitulado: "Estudo clínico de farmacocinética de duas formulações de Isoniazida em voluntários sadios de ambos os sexos: Isoniazida – comprimido de 300 mg, Teste – produzido pelo Instituto de Tecnologia em Fármacos - Farmanguinhos e Isoniazida-LAQFA<sup>®</sup> - 03 comprimidos de 100 mg. Referência – produzido pelo Laboratório Químico Farmacêutico da Aeronáutica" compromete-se a desenvolver a pesquisa supracitada conforme as diretrizes e normas regulamentadoras de pesquisa envolvendo seres humanos das Resoluções nº 196/96 e 251/97 do Conselho Nacional de Saúde - Ministério da Saúde, das Boas Práticas Clínicas segundo o ICH e de acordo com a Declaração de Helsinki (1965) e as revisões de Tóquio (1975), Veneza (1983) e África do Sul (1996) e Escócia (2000). Compromete-se ainda a só utilizar os dados e os materiais biológicos obtidos para a realização das avaliações e relatórios referentes a esta pesquisa clínica.

Rio de Janeiro, 30 de Setembro de 2008.

Drª. Marlice Aparecida Sipali Marques  
Responsável pela Etapa Analítica

## TERMO DE COMPROMISSO

MSc. Luciana da Rocha Pitta, Responsável pela Etapa Estatística do Protocolo de Pesquisa Intitulado: "Estudo clínico de farmacocinética de duas formulações de Isoniazida em voluntários saudáveis de ambos os sexos: Isoniazida – comprimido de 300 mg - Teste - produzido pelo Instituto de Tecnologia em Fármacos - Farmanguinhos e Isoniazida-LAQFA<sup>®</sup> - 03 comprimidos de 100 mg – Referência - produzido pelo Laboratório Químico Farmacêutico da Aeronáutica" compromete-se a desenvolver a pesquisa supracitada conforme as diretrizes e normas regulamentadoras de pesquisa envolvendo seres humanos das Resoluções nº 196/96 e 251/97 do Conselho Nacional de Saúde - Ministério da Saúde, das Boas Práticas Clínicas segundo o ICH e de acordo com a Declaração de Helsinki (1965) e as revisões de Tóquio (1975), Veneza (1983) e África do Sul (1996) e Escócia (2000). Compromete-se ainda a só utilizar os dados e os materiais biológicos obtidos para a realização das avaliações e relatórios referentes a esta pesquisa clínica.

Rio de Janeiro, 30 de Setembro de 2008.

---

MSc. Luciana da Rocha Pitta  
Responsável pela Etapa Estatística



|                    |                                                                                                                                                                                                                                                                                                                                                     |
|--------------------|-----------------------------------------------------------------------------------------------------------------------------------------------------------------------------------------------------------------------------------------------------------------------------------------------------------------------------------------------------|
| Título do estudo:  | "Estudo clínico de farmacocinética de duas formulações de Isoniazida em voluntários sadios de ambos os sexos: Isoniazida comprimido de 300 mg (Teste) produzido pelo Instituto de Tecnologia em Fármacos - Farmanguinhos e Isoniazida-LAQFA® 03 comprimidos de 100 mg (Referência) produzido pelo Laboratório Químico Farmacêutico da Aeronáutica." |
| Data:              | 30/09/2008                                                                                                                                                                                                                                                                                                                                          |
| Versão:            | Final                                                                                                                                                                                                                                                                                                                                               |
| Estudo No. (SPII): | 029/08                                                                                                                                                                                                                                                                                                                                              |

#### DECLARAÇÃO DE CONFIDENCIALIDADE

A informação fornecida neste documento é estritamente confidencial e está disponível para revisão dos investigadores, comitês de ética e outras autoridades nacionais. Não está autorizada a divulgação sem autorização escrita do Instituto de Tecnologia de Fármacos - Farmanguinhos, exceto para os propósitos de obter o consentimento de potenciais pacientes.

## SINOPSE

|                                                           |                                                                                                                                                                                                                                                                                                                                                                     |
|-----------------------------------------------------------|---------------------------------------------------------------------------------------------------------------------------------------------------------------------------------------------------------------------------------------------------------------------------------------------------------------------------------------------------------------------|
| <i>No. de Estudo SPH</i>                                  | 029/08                                                                                                                                                                                                                                                                                                                                                              |
| <i>Código do SENAR</i>                                    | 03.ISZ18-08BE.02                                                                                                                                                                                                                                                                                                                                                    |
| <i>Patrocinador</i>                                       | Instituto de Tecnologia em Fármacos - Farmanguinhos                                                                                                                                                                                                                                                                                                                 |
| <i>Tipo de estudo</i>                                     | Estudo clínico de farmacocinética                                                                                                                                                                                                                                                                                                                                   |
| <i>Objetivos do estudo</i>                                | Caracterização da taxa e extensão de biodisponibilidade de Teste e Referência após a administração de uma dose oral única em condições de jejum.<br>Avaliação de bioequivalência de Teste vs. Referência após administração de uma dose única, determinada por $ASC_{0-24h}$ , $ASC_{0-6h}$ e $C_{max}$ .                                                           |
| <i>Plano do estudo</i>                                    | Aberto, monocêntrico, balanceado, aleatorizado do modelo cruzado em dois períodos, com administração de doses únicas em condições de jejum e com fase de suspensão do tratamento ("wash-out") de no mínimo 07 dias.                                                                                                                                                 |
| <i>População e características gerais</i>                 | 28 voluntários saudáveis de ambos os sexos;<br>• Idade: de 18 a 50 anos, inclusive;<br>• IMC: $\geq 18,5 \text{ kg/m}^2$ e $\leq 29,9 \text{ kg/m}^2$<br>• Bom estado de saúde (ausência de desvios clinicamente significativos em relação a resultados normais físicos e de exames laboratoriais).                                                                 |
| <i>Produto Teste, dosagem e via de administração</i>      | Isoniazida comprimido de 300 mg<br>Administração Oral.                                                                                                                                                                                                                                                                                                              |
| <i>Produto Referência, dosagem e via de administração</i> | Isoniazida-LAQPA <sup>®</sup> - 03 comprimidos de 100 mg -<br>Administração Oral                                                                                                                                                                                                                                                                                    |
| <i>Análise</i>                                            | Fármaco inalterado                                                                                                                                                                                                                                                                                                                                                  |
| <i>Duração do tratamento</i>                              | 2 administrações individuais separadas por um período de wash-out de no mínimo 07 dias entre as administrações (> 7 horas vitais)                                                                                                                                                                                                                                   |
| <i>Volume de sangue por amostra</i>                       | 7,5 mL                                                                                                                                                                                                                                                                                                                                                              |
| <i>Número de amostras por voluntário</i>                  | 16 por período                                                                                                                                                                                                                                                                                                                                                      |
| <i>Volume total de sangue coletado por voluntário</i>     | 300 mL                                                                                                                                                                                                                                                                                                                                                              |
| <i>Período de internação</i>                              | 24 horas                                                                                                                                                                                                                                                                                                                                                            |
| <i>Intervalo mínimo entre as internações (wash out)</i>   | 07 dias                                                                                                                                                                                                                                                                                                                                                             |
| <i>Prazo para a finalização do estudo</i>                 | Até 6 meses após o início do estudo                                                                                                                                                                                                                                                                                                                                 |
| <i>Metodologia analítica</i>                              | LC M/S M/S                                                                                                                                                                                                                                                                                                                                                          |
| <i>Características da ficha de base</i>                   | Dados demográficos<br>História clínica, incluindo história médica<br>Exame físico (incl. ECG de 12 derivações, pressão arterial, temperatura e frequência cardíaca)<br>Exames clínicos de laboratório incluindo Análise Hematológica, Análise Bioquímica, Urina I e $\beta$ -HCG para mulheres (exames pré- e pós-estudo), e sorologia somente no exame pré-estudo. |

Estudo: SPH29/08\_Isoniazida  
 Documento: Protocolo  
 Versão: Final  
 Data: 30 de Setembro de 2008

SYNCHROPHAR – ACESSORIA E DESENVOLVIMENTO DE PROJETOS CLINICOS LTDA  
 ESTUDO DE BIOEQUIVALÊNCIA / SPH 029/08 – ISONIAZIDA

|                                                                                     |                                                                                                                                                                                                                                                                                                                                                                                                                                                                                                                                                                                                                                                                                                                                                                                                                                                                                                                                                                                                                                                                                                                                                                                                                                                                                                                                                                                                                                                                              |
|-------------------------------------------------------------------------------------|------------------------------------------------------------------------------------------------------------------------------------------------------------------------------------------------------------------------------------------------------------------------------------------------------------------------------------------------------------------------------------------------------------------------------------------------------------------------------------------------------------------------------------------------------------------------------------------------------------------------------------------------------------------------------------------------------------------------------------------------------------------------------------------------------------------------------------------------------------------------------------------------------------------------------------------------------------------------------------------------------------------------------------------------------------------------------------------------------------------------------------------------------------------------------------------------------------------------------------------------------------------------------------------------------------------------------------------------------------------------------------------------------------------------------------------------------------------------------|
| <p><b>Segurança</b></p>                                                             | <p>Verificação de Pressão arterial, Temperatura e Frequência Cardíaca em horários pré estabelecidos.</p> <p>Serão relatados Eventos Adversos (EAs) observados e/ou obtidos mediante perguntas gerais ou declarados espontaneamente.</p> <p>Serão relatados, através de perguntas específicas, eventos relacionados ao Sistema Digestório até o <math>T_{max}</math> previsto da droga.</p>                                                                                                                                                                                                                                                                                                                                                                                                                                                                                                                                                                                                                                                                                                                                                                                                                                                                                                                                                                                                                                                                                   |
| <p><b>Variáveis farmacocinéticas</b></p> <p><b>Plano para análise dos dados</b></p> | <p><math>ASC_{0-12h}</math>, <math>ASC_{0-24h}</math>, <math>C_{max}</math> e <math>t_{1/2}</math> <math>t_{1/2}</math></p> <p><b>Parâmetros Farmacocinéticos:</b></p> <p>Apresentação de gráficos e tabelas; estatística descritiva (média aritmética e geométrica, CV, mediana, mín., máx., SD); ANOVA; análise paramétrica; pontos estimados e intervalos de confiança de 90 % para <math>AUC_{0-12h}</math>, <math>AUC_{0-24h}</math> e <math>C_{max}</math>.</p> <p><b>Critérios de decisão para análise confirmatória</b></p> <p>Pontos estimados e intervalos de confiança dentro da faixa 80 – 125% para <math>AUC_{0-12h}</math> limite superior de 125% da faixa de aceitação de 80 a 125 % não é excedida pelo <math>C_{max}</math>.</p> <p><b>Dados demográficos, dados da investigação do pré-estudo e do pós-estudo:</b></p> <p>Serão relacionados e avaliados descritivamente (média aritmética, mediana, mín., máx.).</p> <p><b>Sinais e sintomas pré-tratamento:</b></p> <p>Serão relacionados e avaliados descritivamente, no que diz respeito à intensidade e ação tomada.</p> <p><b>Eventos Adversos</b></p> <p>Serão relacionados e avaliados descritivamente, no que diz respeito à intensidade, relação com a droga, resultado, ação tomada e seriedade.</p> <p><b>Eventos Relacionados ao Sistema Digestório</b></p> <p>Serão relacionados e avaliados descritivamente, no que diz respeito à intensidade e à implicação no resultado do estudo.</p> |
| <p><b>Dado planejado para início do estudo</b></p>                                  | <p>A critério do patrocinador</p>                                                                                                                                                                                                                                                                                                                                                                                                                                                                                                                                                                                                                                                                                                                                                                                                                                                                                                                                                                                                                                                                                                                                                                                                                                                                                                                                                                                                                                            |

\*A faixa de normalidade do IMC é considerada entre 18,5 e 30; segundo o Encontro Nacional dos Centros de Equivalência Farmacêutica e Bioequivalência - CNIO.

FLUXOGRAMA

| Procedimento                                                                 | Exames pré-estudo     | Agenda para períodos I e II <sup>A</sup> | Exames pós-estudo    |
|------------------------------------------------------------------------------|-----------------------|------------------------------------------|----------------------|
| Dia de estudo <sup>A</sup>                                                   | -30 a -2 <sup>B</sup> | I                                        | I <sup>II</sup> a 10 |
| Hora p.a.                                                                    |                       | 12h                                      |                      |
| Termo de consentimento <sup>C</sup>                                          | ✓                     |                                          |                      |
| História clínica incluindo história médica                                   | ✓                     |                                          |                      |
| Exame físico                                                                 | ✓                     |                                          | ✓                    |
| Pressão e Frequência Cardíaca <sup>E, F</sup>                                | ✓                     | ✓                                        | ✓                    |
| Exames laboratoriais                                                         | ✓                     |                                          | ✓                    |
| ECG <sup>F</sup>                                                             | ✓                     |                                          | ✓                    |
| Teste de hálito para álcool (bafômetro <sup>G</sup> )                        | ✓                     | ✓                                        | ✓                    |
| Teste de gravidez <sup>H, I</sup>                                            | ✓                     | ✓                                        | ✓                    |
| Internação <sup>I</sup>                                                      |                       | -12h a 12h p.a.                          |                      |
| Jejum                                                                        |                       | 08h a 4h p.a.                            |                      |
| Refeições e bebidas padronizadas <sup>J</sup>                                |                       | ✓                                        |                      |
| Administração de produtos sob investigação <sup>J</sup>                      |                       | ✓                                        |                      |
| Amostragem de sangue para análise farmacocinética <sup>L</sup>               |                       | 00:00h a 24:00h p.a.                     |                      |
| Bem-estar geral (monitoramento de SSPT e EA) <sup>M</sup>                    | ✓                     | -12h a 24h p.a.                          | ✓                    |
| Questionamento sobre eventos relacionados ao Sistema Digestório <sup>N</sup> |                       | 02:00h p.a.                              |                      |
| Verificações sobre medicação concomitante <sup>M</sup>                       | ✓                     | ✓                                        | ✓                    |
| Controle de restrições <sup>O</sup>                                          |                       | ✓                                        |                      |
| Alta do estudo clínico                                                       |                       |                                          | ✓                    |

- A Procedimentos idênticos serão seguidos em ambos os períodos.
- B Duração de exame (ECG, exceto exames laboratoriais (3 meses) e sorologias (6 meses))
- C Na noite da internação (anterior à administração).
- D Primeiro dia após a coleta de amostras de sangue para farmacocinética.
- E Pressão arterial e frequência cardíaca após 15 minutos de descanso em posição supina.
- F ECG: 12 derivações padrão
- G Teste de bafômetro no dia -1 somente em caso de suspeita ou por exigência do protocolo.
- H Testes de gravidez serão feitos em todas as voluntárias com potencial de gestação no dia -1 de cada período e nos exames pré e pós estudo.
- I A internação começa na noite do dia -1 em ambos os períodos.  
A alta da unidade clínica será 12:00h p.a.
- J Refeições padronizadas nos dias de pré-tratamento: o jantar será finalizado 08 h antes da administração, não será permitida a ingestão de líquidos de 6 h antes a 2 h p.a.  
Refeições padronizadas nos dias de estudo: jantar até 08:00h antes da administração, almoço: 4 - 5 h p.a., lanche da tarde: 7-8 h p.a. e jantar 10 -12 h p.a.
- K Administração de Teste e Referência será feita com 200 mL de água sem gás (temperatura ambiente), em posição supina seguido de inspeção da cavidade oral;

Estudo: SPH029/08\_Isoniazida

Documento: Protocolo

Versão: Final

Data: 30 de Setembro de 2008

SYNCHRON: IAR – ACESSORIA E DESENVOLVIMENTO DE PROJETOS CLÍNICOS LTDA  
ESTUDO DE BIEQUIVALENCIA / SPH 029/08 – ISONIAZIDA

- L Amostras de sangue para determinações analíticas (7,5 ml de sangue por amostra) para ambos os produtos sob pesquisa: -00:30h, 00:20h, 00:40, 01:00h, 01:20h, 01:40h, 02:00h, 02:30h, 03:00h, 03:30h, 04:00h, 05:00h, 06:00h, 08:00h, 12:00h e 24:00h p.a. (16 amostras por período).
- M Perguntas sobre bem-estar geral; No exame pré-estudo, após a internação (na noite do dia -1) para ambos os períodos do estudo) -00:30h, 02:00, 06:00h e 12:00h p.a. e no exame pós-estudo.
- N Questionamentos sobre a ocorrência de Eventos Relacionados ao Sistema Digestório. Os questionamentos serão realizados nos seguintes horários: 02:00h p.a.
- O O controle para restrições será feito em ambas as internações (dia -1).

## CONTEÚDO

|                                                                                              |    |
|----------------------------------------------------------------------------------------------|----|
| SINOPSE.....                                                                                 | 10 |
| FLUXOGRAMA.....                                                                              | 12 |
| ABREVIATURAS.....                                                                            | 16 |
| RESPONSABILIDADES E ENDEREÇOS PARA CONTATO.....                                              | 18 |
| 1. INTRODUÇÃO.....                                                                           | 20 |
| 2. OBJETIVOS DO ESTUDO.....                                                                  | 24 |
| 3. PLANO DO ESTUDO.....                                                                      | 24 |
| 3.1. TIPO DE PLANO DO ESTUDO.....                                                            | 24 |
| 3.2- PRODUTOS SOB INVESTIGAÇÃO.....                                                          | 25 |
| 3.2.1- Seleção das doses no estudo.....                                                      | 25 |
| 3.2.2 - Identidade dos produtos sob investigação.....                                        | 25 |
| 3.2.3- Embalagem e Etiquetagem.....                                                          | 25 |
| 3.3. OBTENÇÃO E CONTABILIZAÇÃO DO(S) PRODUTO(S) PARA O ESTUDO.....                           | 26 |
| 3.4. IDENTIFICAÇÃO DOS MEDICAMENTOS.....                                                     | 27 |
| 3.5. POSOLOGIA E FORMA DE ADMINISTRAÇÃO.....                                                 | 27 |
| 4. DESCRIÇÃO DA POPULAÇÃO ESTUDADA.....                                                      | 27 |
| 4.1. DETERMINAÇÃO DO TAMANHO DA AMOSTRA.....                                                 | 27 |
| 4.2. SELEÇÃO AVALIAÇÃO CLÍNICA DE VOLUNTÁRIOS.....                                           | 28 |
| 4.3. EXAMES CLÍNICOS LABORATORIAIS.....                                                      | 29 |
| 4.4. CRITÉRIOS DE INCLUSÃO DO VOLUNTÁRIO.....                                                | 31 |
| 4.5. CRITÉRIOS DE EXCLUSÃO DO VOLUNTÁRIO.....                                                | 31 |
| 4.6. CRITÉRIOS DE RETIRADA DO VOLUNTÁRIO.....                                                | 33 |
| 4.7. CRITÉRIOS PARA DESCONTINUAÇÃO DO VOLUNTÁRIO.....                                        | 34 |
| 5. EXECUÇÃO CLÍNICA DO ESTUDO.....                                                           | 34 |
| 5.1. Definição Dos Períodos Do Estudo.....                                                   | 34 |
| 5.2. EXAMES PRÉ E PÓS-ESTUDO.....                                                            | 34 |
| 5.2.1 Exames pré-estudo.....                                                                 | 34 |
| 5.2.2.Exames pós-estudo.....                                                                 | 35 |
| 6. LOCAL E FORMA DE CONFINAMENTO DOS VOLUNTÁRIOS.....                                        | 35 |
| 7. CONDUTAS PERMITIDAS E NÃO PERMITIDAS ANTES E DURANTE O ESTUDO.....                        | 36 |
| 7.1. OUTRAS OBRIGAÇÕES E RESTRIÇÕES.....                                                     | 37 |
| 7.2. HORÁRIOS DE JEJUM E DE ALIMENTAÇÃO.....                                                 | 37 |
| 7.3. CRONOGRAMA DE COLETA DAS AMOSTRAS.....                                                  | 38 |
| 8. PROCESSAMENTO E ARMAZENAMENTO INICIAL DAS AMOSTRAS.....                                   | 39 |
| 8.1. ARMAZENAMENTO E TRANSPORTE DAS AMOSTRAS.....                                            | 39 |
| 9. AVALIAÇÃO DE SEGURANÇA.....                                                               | 40 |
| 9.1. REGISTRO E ANÁLISE DOS PARÂMETROS DE SEGURANÇA.....                                     | 41 |
| 9.2. PROCEDIMENTOS PARA REGISTRAR E COMUNICAR EVENTOS ADVERSOS E DOENÇAS INTERCORRENTES..... | 41 |
| 9.3. ACOMPANHAMENTO DOS VOLUNTÁRIOS APÓS EVENTOS ADVERSOS.....                               | 42 |
| 9.4. PROCEDIMENTOS PARA MONITORAR A ADESAO DO VOLUNTÁRIO AO PROTOCOLO.....                   | 43 |

Estudo: SPH29/08\_isoniazida

Documento: Protocolo

Versão: Final

Data: 30 de Setembro de 2008

|                                                                                                            |    |
|------------------------------------------------------------------------------------------------------------|----|
| 10. RISCOS RELACIONADOS COM A PARTICIPAÇÃO DO ESTUDO .....                                                 | 44 |
| 10.1 Riscos relativos ao procedimento .....                                                                | 44 |
| 10.2 Riscos relativos às drogas em investigação .....                                                      | 44 |
| 11. IDENTIFICAÇÃO DOS DADOS A SEREM REGISTRADOS DIRETAMENTE<br>NO FORMULÁRIO DE RELATO DE CASO (CRI) ..... | 45 |
| 11.1. TRATAMENTO DE DOCUMENTAÇÃO DE DADOS CLÍNICOS .....                                                   | 45 |
| 12. ÉTICA .....                                                                                            | 46 |
| 12.1. COMITÊ DE ÉTICA EM PESQUISA .....                                                                    | 46 |
| 12.2. CONDUZA DO ESTUDO .....                                                                              | 46 |
| 12.3 TERMO DE CONSENTIMENTO LIVRE E ESCLARECIDO .....                                                      | 47 |
| 12.4 CONFIDENCIALIDADE .....                                                                               | 47 |
| 12.5 RESSARCIMENTO .....                                                                                   | 47 |
| 12.6 FINANCIAMENTO E SEGURO .....                                                                          | 48 |
| 12.7 MANUSEIO DOS DADOS E MANUTENÇÃO DOS REGISTROS .....                                                   | 48 |
| 13. ETAPA ANALÍTICA E AVALIAÇÃO FARMACOCINÉTICA .....                                                      | 48 |
| 13.1 DETERMINAÇÃO DO PERFIL FARMACOCINÉTICO DA DROGA .....                                                 | 48 |
| 13.2 MÉTODOS DE OBTENÇÃO E REGISTRO DO MATERIAL, PARA<br>QUANTIFICAÇÃO DA DROGA .....                      | 48 |
| 14. MÉTODO ANALÍTICO E VALIDAÇÃO .....                                                                     | 49 |
| 14.1 VALIDAÇÃO PRÉ-ESTUDO .....                                                                            | 49 |
| 14.2 CONTROLE DE QUALIDADE DURANTE A ANÁLISE DE ROTINA DA DROGA<br>E CURVAS DE CALIBRAÇÃO .....            | 55 |
| 14.3 ANÁLISE DAS AMOSTRAS DO ESTUDO .....                                                                  | 55 |
| 14.4 OUTLIERS E REPETIÇÃO DE ANÁLISE .....                                                                 | 56 |
| 14.5. QUANTIFICAÇÃO DAS AMOSTRAS .....                                                                     | 56 |
| 14.6. TRATAMENTO E DOCUMENTAÇÃO DE DADOS BIOANALÍTICOS .....                                               | 56 |
| 15. ANÁLISE FARMACOCINÉTICA .....                                                                          | 56 |
| 15.1 PARÂMETROS FARMACOCINÉTICOS .....                                                                     | 57 |
| 15.2 DESCRIÇÃO DOS CRITÉRIOS E MÉTODOS ESTATÍSTICOS .....                                                  | 57 |
| 15.3. SELEÇÃO DOS VOLUNTÁRIOS A SEREM INCLUÍDOS NA ANÁLISE .....                                           | 58 |
| 16. CONTROLE DE QUALIDADE E GARANTIA DE QUALIDADE .....                                                    | 58 |
| 17. ACESSO DIRETO AOS DOCUMENTOS/DADOS FONTE .....                                                         | 59 |
| 18. POLÍTICA DE PUBLICAÇÃO DOS DADOS .....                                                                 | 59 |
| 19. CRITÉRIOS DE ACEITAÇÃO DE DESVIOS DE PROTOCOLO .....                                                   | 59 |
| 20. RELATÓRIOS .....                                                                                       | 60 |
| 21. ANEXOS .....                                                                                           | 60 |

## ABREVIATURAS

|                   |                                                                                                  |
|-------------------|--------------------------------------------------------------------------------------------------|
| ANOVA             | Análise da Variância                                                                             |
| $ASC_{0-t_{max}}$ | Área sob a curva de concentração vs. tempo, do tempo 0 (zero) ao tempo da última concentração    |
| $ASC_{0-\infty}$  | Área sob a curva de concentração da droga versus tempo do tempo 0 (zero) extrapolada ao infinito |
| BPC               | Boas práticas clínicas                                                                           |
| BPF               | Boas práticas de fabricação                                                                      |
| BPL               | Boas práticas de laboratório                                                                     |
| CYP               | Citocromo P                                                                                      |
| CV                | Coefficiente de variação                                                                         |
| CEP               | Comitê de Ética em Pesquisa                                                                      |
| C                 | Concentração                                                                                     |
| $C_{max}$         | Concentração Máxima                                                                              |
| CS                | Clinicamente Significativo                                                                       |
| CNS               | Clinicamente não significativo                                                                   |
| QC                | Controle de Qualidade                                                                            |
| DP                | Desvio padrão                                                                                    |
| ECG               | Electrocardiograma                                                                               |
| EA                | Evento adverso                                                                                   |
| EAS               | Evento adverso sério                                                                             |
| FDA               | <i>Food and Drug Administration</i>                                                              |
| CRF               | Formulário de relatório de caso - <i>Case Report Form</i>                                        |
| FC                | Frequência cardíaca                                                                              |
| IMC               | Índice Massa corporal                                                                            |
| IRB               | <i>Institutional Review Board</i>                                                                |
| ICH               | <i>International Conference on Harmonisation</i>                                                 |
| LQ                | Limite de Quantificação                                                                          |
| LIQ               | Limite inferior de quantificação                                                                 |
| LSQ               | Limite superior de quantificação                                                                 |



SYNCHROPIAR - ASSESSORIA E DESENVOLVIMENTO DE PROJETOS CLÍNICOS LTDA  
ESTUDO DE BIOEQUIVALÊNCIA / SPH 029/08 – ISONIAZIDA

|          |                                                                   |
|----------|-------------------------------------------------------------------|
| ULN      | Limite superior de valores normais (Upper Limit of Normal Values) |
| LDL      | Lipoproteínas de baixa densidade                                  |
| max      | Máximo                                                            |
| min      | Mínimo                                                            |
| n. d     | Não detectável                                                    |
| pa       | Pós-administração                                                 |
| PA       | Pressão arterial                                                  |
| SCPCM    | Sistema de Controle de Pesquisas Clínicas de Medicamentos         |
| SSPT     | Sinais e sintomas pré-tratamento                                  |
| Tmax     | Tempo no qual ocorre a maior concentração alcançada               |
| LC-MS/MS | Tandem de espectrometria líquida com espectrometria de massas     |
| UCQ      | Unidade de Garantia da Qualidade                                  |

SYNCHROPHAR – ASSESSORIA E DESENVOLVIMENTO DE PROJETOS CLÍNICOS LTDA  
ESTUDO DE BIOEQUIVALÊNCIA / SPH 029/08 – ISONIAZIDA

RESPONSABILIDADES E ENDEREÇOS PARA CONTATO

| ETAPA                                    | LOCAL                                                                                                                                                                                                           | RESPONSÁVELS                                                                                                                                                                                                                            |                                                                                                                                              |
|------------------------------------------|-----------------------------------------------------------------------------------------------------------------------------------------------------------------------------------------------------------------|-----------------------------------------------------------------------------------------------------------------------------------------------------------------------------------------------------------------------------------------|----------------------------------------------------------------------------------------------------------------------------------------------|
| INVESTIGADOR PRINCIPAL                   | Fundação Oswaldo Cruz/Instituto de Pesquisa Clínica Evandro Chagas - Serviços de Farmacocinética/IFEC-SHIFAR<br>Av. Brasil, nº 4365 - Mangueiras - Rio de Janeiro - RJ - CEP: 21.045-360<br>Tel: (21) 2560 0885 | Roberto Werneck Barroso, M.D., PhD                                                                                                                                                                                                      | Médico CRM 5241807-7                                                                                                                         |
| RESPONSÁVEL PELA ETAPA CLÍNICA           | Synchrophar - Ass e Desenv. de Projetos Clínicos Ltda<br>R: Engenheiro Cândido Gomide, 38<br>Campinas - SP<br>CEP: 13070-200<br>Tel: (55) (19) 3233-6383                                                        | Ney Carter do Carmo Borges M.D., M.Sc., PhD<br><br>Ronilson Arnaldo Moreira B.Sc., M.Sc., Ph.D                                                                                                                                          | Médico CRM: 50535<br><br>Biólogo                                                                                                             |
| COORDENAÇÃO DO CENTRO                    | Synchrophar - Ass e Desenv. de Projetos Clínicos Ltda.<br>R: Engenheiro Cândido Gomide, 38<br>Campinas - SP<br>CEP: 13070-200<br>Tel: (55) (19) 3233-6383                                                       | Claudia Cristiana Domingues                                                                                                                                                                                                             | Enfermeira COREN: 70197                                                                                                                      |
| COORDENAÇÃO DE PESQUISA CLÍNICA          | Synchrophar - Ass e Desenv. de Projetos Clínicos Ltda.<br>R: Engenheiro Cândido Gomide, 38<br>Campinas - SP<br>CEP: 13070-200<br>Tel: (55) (19) 3233-6383                                                       | Váley Aleksandrovich de Carvalho                                                                                                                                                                                                        | Biólogo CRBio 61852/01-D                                                                                                                     |
| AVALIAÇÃO CLÍNICA                        | Synchrophar - Ass e Desenv. de Projetos Clínicos Ltda.<br>R: Engenheiro Cândido Gomide, 38<br>Campinas - SP<br>CEP: 13070-200<br>Tel: (55) (19) 3233-6383                                                       | Dr. Ney Carter do Carmo Borges<br>Dra. Kélea Rosana da Silva Quadros<br>Dr. Sandro Silva Vitela<br>Dr. Ricardo Pereira Moreira<br>Dra. Fabiana Duarte Mendes e Modulo<br>Dr. Celso Henrique de Oliveira                                 | Médico CRM: 50.535<br>Médico CRM: 81.194<br>Médico CRM: 100.506<br>Médico CRM: 115.858<br>Médica CRM: 97708<br>Médico CRM: 79.471            |
| ETAPA CLÍNICA                            | Hospital Santos Dumont<br>Rua João de Mesu, Itá, 571, Campinas<br>Campinas, SP, Brasil CEP: 13015-110<br>Tel: (19) 3737-7061                                                                                    | Dr. Ronilson Arnaldo Moreira<br>Dr. Ney Carter do Carmo Borges<br>Dra. Kélea Rosana da Silva Quadros<br>Dr. Sandro Silva Vitela<br>Dr. Ricardo Pereira Moreira<br>Dra. Fabiana Duarte Mendes e Modulo<br>Dr. Celso Henrique de Oliveira | Biólogo<br>Médico CRM: 50.535<br>Médica CRM: 81.194<br>Médico CRM: 100.506<br>Médico CRM: 115.858<br>Médica CRM: 97708<br>Médico CRM: 79.471 |
| PROCESSAMENTO DAS AMOSTRAS LABORATORIAIS | Fibersão - CENFROLAB Diagnóstico Clínico (CDC)<br>Rua José Afonso, 167 - Centro - Volantes - SP<br>CEP: 13.240-270<br>Fone / Fax: (19) 3869.3069                                                                | Dr. Ronaldo Sales                                                                                                                                                                                                                       | Médico CRM: 48.701                                                                                                                           |
| ANÁLISE DAS AMOSTRAS                     | Fundação Oswaldo Cruz/Instituto de Pesquisa Clínica Evandro Chagas - Serviços de Farmacocinética/IFEC-SHIFAR<br>Av. Brasil, nº 4365 - Mangueiras - Rio de Janeiro - RJ - CEP: 21.045-360<br>Tel: (21) 2560 0885 | Marice Ap. Sipoli Marques                                                                                                                                                                                                               | Farmacêutica CRF: 3735                                                                                                                       |

Estudo: SP112/08 - Isoniazida

Documento: Protocolo

Versão: Final

Data: 30 de Setembro de 2008

**SYNCHROPHAR – ACESSORIA E DESENVOLVIMENTO DE PROJETOS CLINICOS LTDA**  
**ESTUDO DE BIOEQUIVALÊNCIA / SPH 029/08 – ISONIAZIDA**

|                                              |                                                                                                                                                                                                         |                                                          |                           |
|----------------------------------------------|---------------------------------------------------------------------------------------------------------------------------------------------------------------------------------------------------------|----------------------------------------------------------|---------------------------|
| <b>ANÁLISE FARMACOCINÉTICA E ESTATÍSTICA</b> | Serviço de Farmacocinética<br>Inst. de Pesquisa Clínica Evandro Chagas<br>Fundação Casa de São Cruz<br>Avenida Brasil, 4365 - Mangueiras<br>21040-360 - Rio de Janeiro - RJ<br>Tel. (55) (21) 3855-9568 | Dr. Eduardo Werneck Barros<br>Ate. Luciana da Rocha Pita | Médico<br>Estatística     |
| <b>GERENTE DA QUALIDADE</b>                  | Synchrophar - Ass e Desenv. de Projetos<br>Clínicos Ltda.<br>R. César Berrenbach, 24 - SJ 52<br>Campinas - SP<br>CEP 13015-025<br>Tel: (55) (19) 3234 2831                                              | Sandra Evandir de Oliveira                               | Mestre - F.C.M. - Unicamp |

## I. INTRODUÇÃO

A Isoniazida é uma hidrazida derivada de ácido isonicotínico. Antituberculoso bactericida sintético, agindo somente contra micobactérias, principalmente aquelas que se dividem ativamente<sup>1</sup>.

A Isoniazida é uma das três drogas mais importante no tratamento de tuberculose<sup>2</sup>. O tratamento da tuberculose é feito geralmente pela associação da Isoniazida com Rifampicina e Pirazinamida<sup>3</sup>.

É um fármaco descrito quimicamente como, Ácido 4,piridinocarboxílico hidrazina<sup>1</sup>, é um fármaco que apresenta a fórmula molecular  $C_6H_7N_3O$  e peso molecular 137,1

O fármaco é um cristal incolor ou branco ou pó cristalino branco. É inodoro e lentamente afetado através de exposição ao ar e luz. É solúvel em água; moderadamente solúvel em álcool, e ligeiramente solúvel em clorofórmio e em éter.<sup>3</sup>

Segue abaixo sua fórmula estrutural:

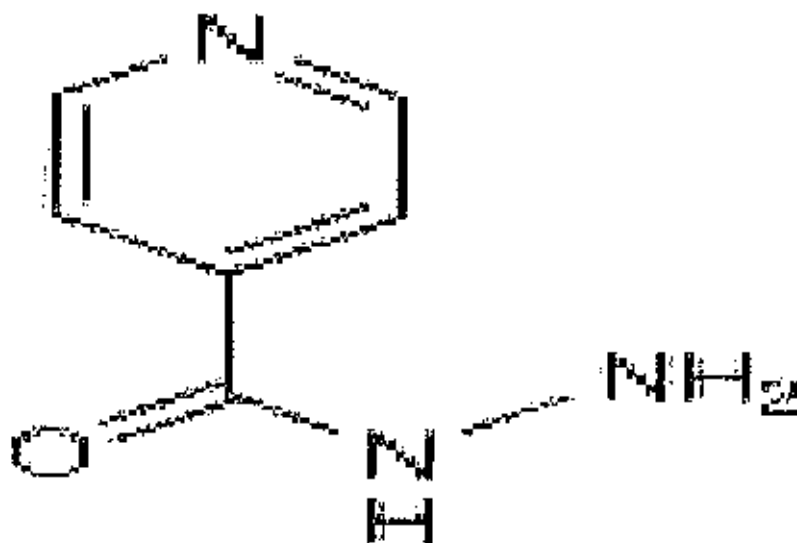

Seu mecanismo de ação não é conhecido, mas pode atuar por inibição da síntese do ácido micólico e ruptura da parede celular em organismos sensíveis.<sup>1</sup>

Alguns estudos mostram que os acetiladores rápidos têm um risco aumentado de desenvolverem toxicidade hepática devida à indução enzimática causada pela isoniazida. Outros estudos mostram precisamente o contrário! Como a NAT2 é também responsável

pela destoxificação dos metabólitos agressivos, se esta reação se processa de uma forma mais lenta, a toxicidade irá ser maior.

É a existência de uma enzima semelhante à NAT2 no *Mycobacterium tuberculosis* que justifica a ação da isoniazida como tuberculostático e a resistência ao mesmo composto.<sup>6</sup>

Sua absorção ocorre facilmente após a administração oral ou parenteral, distribui-se em todos os líquidos e tecidos<sup>1</sup>. Porém é reduzida se ingerida juntamente com alimentos<sup>7</sup>.

A dosagem recomendada é de 5mg/Kg chegando ao máximo em 300 mg diários. Doses de 1,5 g ou mais são potencialmente tóxicas e doses de 10 a 15 g podem ser fatais sem o tratamento adequado<sup>8</sup>.

Na administração por via oral, o pico de concentração plasmática ocorre em aproximadamente 2 horas (em jejum).<sup>5</sup> Sua taxa e extensão de absorção são reduzidas quando administradas juntamente com alimentos.<sup>8</sup> Há acetiladores rápidos e lentos, sendo estes mais propensos a manifestações de hepatotoxicidade<sup>1</sup>. A Isoniazida atravessa a barreira placentária e é excretada no leite<sup>5</sup>. É um fármaco com baixa taxa de ligação as proteínas e distribuição nos tecidos e fluidos corporais.<sup>5</sup>

Sua meia vida de eliminação é de aproximadamente 1 a 6 horas. Sua principal via metabólica é a acetilação da isoniazida para acetilisoniazida pela N-acetiltransferase, encontradas no fígado e intestino delgado. Os metabólitos de Isoniazida não têm nenhuma atividade tuberculostática, eles são menos tóxicos. Pode-se conjugar a Isoniazida não-acetilada de forma parcial. Em pacientes com função renal normal, mais de 75% da dose aparece na urina em 24 horas principalmente como metabólitos.<sup>5</sup>

A Isoniazida isolada é indicada para o tratamento de tuberculose (TBC) e associada com outros antituberculosos no tratamento da TBC, meningite tuberculosa, infecções micobacterianas atípicas.<sup>1</sup>

É um medicamento contra-indicado em indivíduos que tenham reações de hipersensibilidade severas, incluindo hepatite droga-induzida. Previamente disfunção hepática associado a Isoniazida<sup>5</sup>. Também é contra-indicada em indivíduos com alcoolismo ativo ou tratado.<sup>1</sup>

Algumas precauções e advertências devem ser tomadas: a Isoniazida deve ser tomada de forma simultânea com a Piridoxina, para evitar ou minimizar os sintomas de neurite periférica, exceto em crianças se a dieta for adequada. Deve-se evitar a ingestão de bebidas alcoólicas durante o tratamento com o fármaco.

Isoniazida deve ser utilizada com precaução em pacientes com perturbações convulsivas, com histórico de psicose, insuficiência hepática ou renal.

Cuidadosa monitorização devem ser consideradas para negros e mulheres hispânicas, nos quais poderá haver um aumento do risco de hepatite fatal<sup>6</sup>.

Efeitos hematológicos relatados sobre a utilização de isoniazida incluem diversas anemias, agranulocitose, trombocitopenia e eosinofilia. Menos de 1% dos pacientes apresentam reações cutâneas, incluindo urticária, púrpura, lúpus eritematoso e dermatite exfoliativa<sup>4</sup>.

Neuropatia periférica é o efeito tóxico mais comum. Outros efeitos neurológicos incomum com doses convencionais são: convulsões, encefalopatia tóxica, neurite, prejuízo de memória, e psicose tóxica.

Efeitos hepáticos como elevação das Transaminases (SGOT; SGPT), bilirrubinemia, bilirrubinúria, icterícia ocasionalmente severo e às vezes hepatite fatal. Também foram relatadas agranulocitose, eosinofilia, trombocitopenia, anemia hemolítica, sideroblástica ou aplástica.<sup>5</sup>

Outros efeitos adversos incluem: náuseas, vômito, boca seca, constipação, febre, vertigem, vasculite, hiperreflexia, retenção de urina e Ginecomastia<sup>6</sup>.

Isoniazida pode inibir o metabolismo hepático de várias drogas, em alguns casos, levando ao aumento da toxicidade; os corticóides e glicocorticóides podem aumentar o metabolismo ou a excreção da mesma, com diminuição das concentrações plasmáticas. O uso diário e simultâneo de álcool pode aumentar o efeito anticoagulante da cumarina e indandiona e inibir a eliminação de Diazepam e Triazolam aumentando suas concentrações plasmáticas. Diminui as concentrações séricas do Ketoconazol; pode produzir deficiência de ácido nicotínico, inibindo sua incorporação dinucleotídeo de adenina e nicotinamida. Inibe a paraidroxilação da Fenitoína, com o aumento das concentrações séricas desta.<sup>1</sup>

A superdosagem da Isoniazida produz sinais e sintomas dentro de 30 minutos a 3 horas após sua ingestão. Náusea, vômito, vertigem, pronúncia da fala inarticuladamente e alucinações visuais, são os sintomas mais frequentes.<sup>2</sup>

Referências Bibliográficas:

- 1- P.R. vade-mécum. - 6.ed. - São Paulo; Sorjak, 2000, pp: 106-107.
- 2- C. A. Peloquin, R. Nandur, A. A. Dodge, D. E. Nix . Pharmacokinetics of isoniazid under fasting conditions, with food, and with antacids. *The International Journal of Tuberculosis and Lung Disease*. Int J Tuberc Lung Dis 3(8):703-710.
- 3- Shrutidevi Agrawal, Kanwal Jit Kaur, Inderjit Singh, Shantaram R. Bhade, Chanten Lal Kaul, Ramesh Panchagnpta . Assessment of bioequivalence of rifampicin, isoniazid and pyrazinamide in a four drug fixed dose combination with separate formulations at the same dose levels. *International Journal of Pharmaceutics* 233 (2002) 169-177.
- 4- Bula Isoniazida. Disponível em: [http://www.pfamed.com.br/diccionario/pfamed\\_0001\\_10159.php](http://www.pfamed.com.br/diccionario/pfamed_0001_10159.php). Acesso em 14/04/2008.
- 5- Mosby's Drug consult, 2006. Disponível em: [http://127.0.0.1:8080/rami?COMMAND=applystylesheet\(mp5/@ix\\_mdc.xsl,mp5/@mdc/e1585.pub\)&p\\_mode=drug](http://127.0.0.1:8080/rami?COMMAND=applystylesheet(mp5/@ix_mdc.xsl,mp5/@mdc/e1585.pub)&p_mode=drug). Acesso em 11/04/2008.
- 6- Disponível em: <http://www.ff.up.pt/toxicologia/monografias/ano0304/Tuberculose/doc/iso%20toxico.htm>. Acesso em 17/04/2008.
- 7- Bula Valifol®. Disponível em: [plm.wyeth.com.mx/20026.htm](http://plm.wyeth.com.mx/20026.htm). Acesso em 14/04/2008.
- 8- Martindale: The Complete Drug Reference, 2008. Disponível em: <http://www.medicinescomplete.com/mc/martindale/current/7559-k.htm#m7559-a4-x>. acesso em 14/04/2008.

## 2. OBJETIVOS DO ESTUDO

Avaliar se a formulação de Isoniazida (comprimido de 300 mg produzido pelo Instituto de Tecnologia em Fármacos – Farmanguinhos – produto teste) atinge níveis plasmáticos equivalentes aos da formulação de Isoniazida-LAQFA® 03 comprimidos de 100 mg - produto referência, produzido pelo Laboratório Químico Farmacêutico da Aeronáutica), quando administrada em 28 voluntários sadios adultos de ambos os sexos.

A biodisponibilidade comparativa das formulações seguida à administração oral será avaliada com base em comparações estatísticas de parâmetros farmacocinéticos relevantes obtidos de dados de concentração plasmática da droga (fármaco inalterado).

## 3. PLANO DO ESTUDO

O estudo é delineado de forma a permitir que se obtenham os parâmetros farmacocinéticos relevantes para a comparação estatística visando a averiguação de bioequivalência. Neste estudo, tais parâmetros são obtidos diretamente a partir da determinação da concentração plasmática do princípio ativo do medicamento, baseado na aplicação de um modelo não compartimental, próprio para avaliação destas concentrações após a administração do medicamento por via oral.

### 3.1. TIPO DE PLANO DO ESTUDO

O estudo será aberto, monocêntrico, balanceado, aleatorizada, cruzado, com 2 tratamentos, 2 seqüências, 2 períodos, nos quais os voluntários recebem, em cada período, a formulação teste ou a formulação referência. A seqüência de tratamento atribuída a cada voluntário nos períodos de estudo é determinado por uma lista de aleatorização gerada automaticamente pelo sistema R2.2.

As formulações serão administradas em dose única por via oral seguidos de coletas de sangue de pelo menos 3 meias vidas. Os períodos de tratamento deverão obedecer um intervalo mínimo de 7 meias-vidas entre eles (período de wash out da droga), sendo deste estudo 07 dias de intervalo.

Os voluntários serão aleatoriamente designados a uma das seguintes seqüências de tratamento.

Tabela 1: Definição das seqüências de tratamento

| Seqüência | Período I  | Período II |
|-----------|------------|------------|
| 1         | Referência | Teste      |
| 2         | Teste      | Referência |



### 3.2- PRODUTOS SOB INVESTIGAÇÃO

#### 3.2.1-Seleção das doses no estudo

Neste estudo a dose única será de 1 comprimido de 300 mg de Isoniazida e 3 comprimidos de 100mg de Isoniazida-LAQFA<sup>®</sup>, dose individual escolhida.

#### 3.2.2 - Identidade dos produtos sob investigação

O produto Referência está registrado no Laboratório Químico Farmacêutico da Aeronáutica. As amostras terão sua origem diretamente a partir de lotes de produção. O produto teste foi produzido pelo Instituto de Tecnologia em Fármacos - Farmanguinhos.

Antes do início do estudo o produto Teste é verificado pelo Instituto de Tecnologia em Fármacos - Farmanguinhos. Em relação aos parâmetros relevantes de qualidade farmacêutica, especialmente a dissolução *in vitro* comparada com a referência. Os lotes selecionados para o estudo devem ser de qualidade adequada e devem ser fabricados de acordo com as normas de BPF (Boas Práticas de Fabricação).

As seguintes amostras de produtos sob investigação foram escolhidas para o estudo (Tabela 2):

| Informação Farmacêutica | Produto Teste                                                                 | Produto Referência                                                                    |
|-------------------------|-------------------------------------------------------------------------------|---------------------------------------------------------------------------------------|
| Nome do produto         | Isoniazida                                                                    | Isoniazida-LAQFA <sup>®</sup>                                                         |
| Fabricante              | Instituto de Tecnologia em Fármacos - Farmanguinhos                           | Laboratório Químico Farmacêutico da Aeronáutica                                       |
| Ingrediente Ativo       | Isoniazida                                                                    | Isoniazida                                                                            |
| Formulação              | Comprimido                                                                    | Comprimido                                                                            |
| Dosagem                 | 300 mg                                                                        | 100 mg                                                                                |
| Número de lote          | 06102382                                                                      | 07090034                                                                              |
| Data de Fabricação      | 10/2006                                                                       | 09/2007                                                                               |
| Data de Validade        | 10/2008                                                                       | 09/2010                                                                               |
| Endereço                | Av. Comandante Guarany,<br>147 Jacarepaguá - 22775 610<br>Rio de Janeiro - RJ | Estrada do Galeão s/nº - Ilha do Governador<br>Rio de Janeiro - RJ<br>CEP: 21.941-000 |

#### 3.2.3- Embalagem e Rotulagem

Os produtos sob investigação serão embalados de forma individual para cada voluntário incluído no estudo clínico. O número de unidades a serem embaladas será especificado no item 3.2.1., deste protocolo. Uma quantidade extra de medicamento, conforme critério do farmacêutico responsável, será enviada em envelope lacrado, para eventuais perdas até o momento da administração.

Estudo: SPH09/08\_Isoniazida

Documento: Protocolo

Versão: Final

Data: 30 de Setembro de 2008

A etiqueta do medicamento deve ser padronizada conforme as figuras abaixo (modelo):

Teste:

|                                                         |                 |      |
|---------------------------------------------------------|-----------------|------|
| Voluntário No:                                          | TESTE           |      |
| Qtde.: un.                                              |                 |      |
| FARM:                                                   | ISONIAZIDA      | SPH: |
| Lote no:                                                | Data expiração: |      |
| Instituto de Tecnologia em Fármacos - Farmanguinhos     |                 |      |
| Farm.: Eduardo Zambon Orpinelli CRF: 27.481 Data e Hora |                 |      |

Referência

|                                                         |                               |      |
|---------------------------------------------------------|-------------------------------|------|
| Voluntário No:                                          | REFERÊNCIA                    |      |
| Qtde.: un.                                              |                               |      |
| FARM:                                                   | Isoniazida-LAQFA <sup>®</sup> | SPH: |
| Lote no:                                                | Data expiração:               |      |
| Laboratório Químico Farmacêutico da Aeronáutica         |                               |      |
| Farm.: Eduardo Zambon Orpinelli CRF: 27.481 Data e Hora |                               |      |

Todas as medicações serão armazenadas em caixas codificadas não identificadas, segundo as condições de armazenamento especificadas pelo fabricante (Armazenamento entre 15°C e 30°C, protegida da luz e da umidade) ou conforme orientação do fabricante. Um número adequado de amostras de retenção para cada produto será armazenado no local do pesquisador.

### 3.3. OBTENÇÃO E CONTABILIZAÇÃO DO(S) PRODUTO(S) PARA O ESTUDO

O medicamento teste deve ser enviado pelo patrocinador ou centro de equivalência farmacêutica. Se o medicamento teste já esteja no mercado, este pode ser adquirido pelo centro responsável pelo estudo. Deverão ser enviadas quantidades extras da(s) formulação(ões) teste tanto para fins de retenção de amostras como para a administração da(s) mesma(s). A formulação referência deverá ser adquirida conforme RE 41/2000.

Estudo: SPI029/08\_Isoniazida

Documento: Protocolo

Versão: Final

Data: 30 de Setembro de 2008

Os frascos dos medicamentos terão tampas com cores distintas para diferenciar a medicação teste da medicação referência.

Ao final de cada confinamento, a medicação remanescente (ambos os produtos) será enviada de volta para a Synchrophar (Unidade Rua Candido Gomes nº 38) em suas embalagens originais, incluindo as parcialmente utilizadas e as não utilizadas, que serão conservadas como amostras de retenção extra, em quantidade suficiente para a repetição do estudo.

A Synchrophar manterá em local próprio, amostras de retenção de ambas formulações até um ano após o vencimento do prazo de validade mais longo. Será mantido um inventário com o registro das drogas recebidas, administradas, devolvidas, enviadas ao patrocinador ou retidas.

### 3.4. IDENTIFICAÇÃO DOS MEDICAMENTOS

**Formulação Referência:** Isoniazida-LAQFA<sup>®</sup> - 03 comprimidos de 100 mg produzido pelo Laboratório Químico Farmacêutico da Aeronáutica

**Formulação Teste:** Isoniazida – comprimido de 300 mg produzido pelo Instituto de Tecnologia em Fármacos - Farmanguinhos.

### 3.5. POSOLOGIA E FORMA DE ADMINISTRAÇÃO

Os voluntários receberão em cada um dos períodos de internação, 01 comprimido contendo 300 mg de Isoniazida e 03 comprimidos de 100mg de Isoniazida-LAQFA<sup>®</sup> acima discriminados, por via oral em dose única, com um copo de água mineral sem gás e em temperatura ambiente (200 mL), seguindo a aleatorização do estudo (Anexo I).

## 4. DESCRIÇÃO DA POPULAÇÃO ESTUDADA

A população a ser estudada será constituída de 28 voluntários sadios, adultos de ambos os sexos com idade de 18 a 50 anos, com índice de massa corpórea maior ou igual a 18,5 e menor ou igual a 29,9. Não há restrições quanto ao grupo étnico. Os voluntários serão recrutados entre aqueles que se apresentem à Unidade Clínica.

### 4.1. DETERMINAÇÃO DO TAMANHO DA AMOSTRA

O tamanho da amostra do estudo - N= 28 voluntários - foi baseado nos seguintes itens:

- 1- literatura específica e estudos já realizados pelo centro clínico.
- 2- estimativa da variabilidade intra/inter individual da droga
- 3- Possíveis drop outs.
- 4- segurança de um poder estatístico confiável, assumindo que as formulações em estudo serão consideradas com biodisponibilidade equivalente quando o intervalo de confiança (IC) de 90% da média geométrica da ASC (no que diz respeito à extensão da absorção), C<sub>max</sub> (no que diz respeito à velocidade de absorção), estiverem dentro do intervalo de 80-125% da média geométrica da formulação referência.

#### 4.2. SELEÇÃO AVALIAÇÃO CLÍNICA DE VOLUNTÁRIOS

A seleção de voluntários será realizada na Synchrophar, através da unidade responsável pela Etapa Clínica. Um mínimo de 28 voluntários sadios de ambos os sexo, sendo 14 homens e 14 mulheres, serão selecionados diretamente da população da região, uma vez que não está ainda definido de que estudo eles participarão.

Os voluntários serão aceitos no estudo somente se forem considerados saudáveis, a juízo de profissionais legalmente habilitados, com base na história médica, exame físico e os exames laboratoriais que antecedem a admissão no estudo.

Os voluntários são recrutados por meio de rede relacionamentos, contato com voluntários já cadastrados ou pelo cadastro via internet disponível no site do Centro de Pesquisa. As pessoas interessadas são orientadas a comparecer ao local de recrutamento em hora marcada pelo telefone, para uma palestra. Nesta palestra será abordado: o que é recrutamento, como se dá o processo de recrutamento, como é uma pesquisa clínica em linhas gerais, que existe a necessidade de uma consulta médica e uma série de exames prévios para avaliar a saúde do candidato. O candidato é informado também sobre o termo de consentimento, comitê de ética, etc.

Se o candidato decidir cadastrar-se como voluntário, dirigi-se à recepção, que realiza a confirmação da coleta de dados pessoais (tais como: nome, data de nascimento, CPF, RG, sexo, grau de instrução, estado civil, endereço, telefone dos voluntários), anteriormente coletadas. Posteriormente, o voluntário é encaminhado para consulta de enfermagem, a fim de se obter assinatura do Termo de Recrutamento (Anexo 3) em duas vias (uma via é fornecida ao voluntário e a outra arquivada em sua documentação), e realização da consulta de enfermagem (história clínica, dados antropométricos, sinais vitais e teste de hemoglobimetria). Em posse do resultado do teste de hemoglobimetria, dados antropométricos e sinais vitais, segundo o critério de inclusão do estudo, será definido pelo prosseguimento do voluntário no processo de recrutamento, considerando apto ou inapto, se for considerado inapto, este recebe as orientações pertinentes e se necessário será encaminhado para o serviço de saúde. Os voluntários aptos, serão encaminhados para consulta médica para realização do exame físico e anamnese. Caso o voluntário seja considerado apto será encaminhado para fazer exames laboratoriais, segundo Resolução RE nº 894, de 29 de maio de 2003 (Hemograma, bioquímica, teste de gravidez ( $\beta$ HCG) para as mulheres e sorologia para HIV, Hepatite B e C) e exames complementares, caso contrário o voluntário receberá as orientações pertinentes e se necessário será encaminhado para o serviço de saúde. Após o recebimento e avaliação dos resultados dos exames laboratoriais e complementares, o médico avaliará a aptidão do voluntário para participação no estudo ou, em caso contrário, receberá orientações pertinentes e se necessário será encaminhado para o serviço de saúde.

Os voluntários serão também informados sobre as restrições de uso de medicamentos e demais quesitos (diretrizes e restrições) constantes neste Protocolo.

Uma vez confirmada a aptidão, os voluntários terão esclarecidas todas as dúvidas restantes, e caso concordem, assinarão o Termo de Consentimento Livre e Esclarecido (Anexo 04) para participação no estudo.

Os voluntários considerados aptos para participar do estudo, serão internados por dois períodos de aproximadamente 24 horas cada, com intervalo mínimo de 07 dias entre as internações, devendo retornar à Clínica ou hospital para a coleta de amostra correspondente ao tempo de 24:00h após a administração do medicamento, em cada período de internação, conforme tabela 7, do item 7.3.

#### 4.3. EXAMES CLÍNICOS LABORATORIAIS

Para fins de avaliação das condições de saúde, durante o processo de seleção os voluntários realizarão os testes apresentados na tabela abaixo:

Tabela 03: Exames Laboratoriais a serem referenciados no CRF

| Categoria            | Exames                                                                                                                                                                         |
|----------------------|--------------------------------------------------------------------------------------------------------------------------------------------------------------------------------|
| EKG                  | EKG padrão com 12 derivações                                                                                                                                                   |
| Análise hematológica | hemoglobina, hematócrito, contagem total e diferencial de leucócitos, contagem de glóbulos vermelhos, contagem de plaquetas.                                                   |
| Análise Bioquímica   | Uréia, creatinina, bilirrubina total, proteínas totais, albumina, glicose em jejum, fosfatase alcalina, SGOT, SGTP, colesterol total, triglicérides, ácido úrico, $\gamma$ GT. |
| Urina                | Sunário de Urina (urina I)                                                                                                                                                     |
| Sorologia            | Análise Sorológica para: hepatite B, hepatite C e HIV(1+2)                                                                                                                     |
| Teste para gravidez  | $\beta$ HCG (para mulheres)                                                                                                                                                    |

Os resultados dos exames do laboratório serão considerados “normais” quando dentro da faixa de valores declarada pelo laboratório. No entanto, os valores alterados dos resultados dos exames também podem ser considerados “normais” caso o Investigador ou médico responsável os julguem como clinicamente não significativos CNS. Caso, a juízo do investigador haja necessidade de repetição de exames para certificar-se da aptidão do voluntário esta será realizada antes da seleção do voluntário. Alterações dos kits de teste utilizados, após a aprovação deste Protocolo, resultando em novas faixas de normalidade, serão referenciadas nos CRFs e no Relatório Clínico.

O eletrocardiograma será avaliado por um cardiologista da equipe de avaliação clínica da Synchrophar, que deverá informar se os achados específicos são julgados como normais, anormais CNS ou anormais. O médico clínico responsável informará se o voluntário é considerado apto a participar do estudo. O relatório do EKG será mantido como parte da documentação do estudo.

Deve ser registrado no Formulário de Relato de Caso (CRF) dos voluntários sempre que um resultado de exame for considerado como “ clinicamente não significativo” (CNS), a juízo do Investigador.

Antes da admissão no estudo, os voluntários deverão submeter-se a um exame clínico, que deverá ser explicitamente documentado no Formulário de Relato do Caso (CRFs), englobando a revisão dos seguintes itens:

Tabela 04: Itens da História Clínica e Exame físico a serem referenciados no CRF

| <u>Categoria</u>             | <u>Exames</u>                                                                                                                                                                                                                                               |
|------------------------------|-------------------------------------------------------------------------------------------------------------------------------------------------------------------------------------------------------------------------------------------------------------|
| <u>História Médica</u>       | Alergias; olhos, nariz e garganta; sistemas respiratório, cardiovascular, gastrointestinal, genito urinário, nervoso central, hematopoiético-linfático, endócrino; dermatológico, musculoesquelético; estabilidade emocional, história familiar, cirúrgica. |
| <u>Exame Físico</u>          | olhos, orelhas, nariz, garganta, pescoço (incluindo tireóide), coração, pulmões, abdômen (incluindo fígado e baço), pele, linfonodos, sistema nervoso, esqueleto e músculos.                                                                                |
| <u>Dados antropométricos</u> | Pressão arterial (medida 15 minutos após descanso, na posição sentada; pulso; altura; peso - roupas leves; índice de massa corpórea; temperatura em °C).                                                                                                    |

A pressão arterial será considerada como normal dentro dos seguintes limites: 90-139 mm Hg para a sistólica e 50-89 mm Hg para a diastólica. A frequência cardíaca dentro de 50-100 h.p.m será considerada normal. A temperatura corporal dentro de 35,5°C a 37,5°C será considerada normal. Em caso de valores destes exames encontrarem-se fora daqueles considerados como “normais”, o investigador poderá repeti-los a fim de certificar-se da aptidão do voluntário.

O índice de Massa Corpórea será considerado normal quando maior ou igual a 18,5 e menor ou igual a 29,9.

Deverá ser anotado pelo investigador na ficha clínica de cada voluntário qualquer anormalidade de história médica e exame físico considerada CNS, conforme julgado pelo próprio investigador.

Os exames laboratoriais deverão ser realizados em um período não superior a 3 meses que antecedem a primeira administração da medicação. Já os exames de  $\beta$ HCG e as sorologias têm duração de 30 dias e 6 meses respectivamente.

Os exames clínicos deverão ser realizados em um período não superior a 30 dias que antecedem a administração da medicação.

O teste de gravidez (HCG na urina) será feito na noite das internações.

Os exames laboratoriais pós-estudo e ECG serão repetidos cerca de 10 dias após a última coleta de sangue do ensaio, em horário previamente estabelecido. Após o recebimento destes resultados, em data já agendada por ocasião da coleta dos exames, os voluntários deverão comparecer para o exame clínico de alta, data em que serão, em princípio, dispensados. No

entanto, o acompanhamento de um ou mais voluntários poderá ser prolongado, implicando ou não a realização de consultas ou exames laboratoriais adicionais, em função de possíveis eventos adversos detectados.

#### 4.4. CRITÉRIOS DE INCLUSÃO DO VOLUNTÁRIO

Os seguintes critérios devem ser satisfeitos para que o voluntário possa participar do estudo:

- Homens e mulheres na idade entre 18 a 50 anos, inclusive;
- Mulheres não grávidas e que não estejam amamentando;
- O voluntário que tenha seu índice de massa corpórea maior ou igual a 18,5 e menor ou igual a 29,9;
- Fumantes e não fumantes. Caso sejam incluídos fumantes, os mesmos devem ser identificados;
- Boas condições de saúde ou sem doenças significativas, a juízo de um profissional legalmente habilitado, de acordo com as regras definidas no Protocolo, e avaliações a que foi submetido: história clínica, medidas de pressão arterial e frequência cardíaca, exame físico, ECG, e exames laboratoriais complementares;
- Capaz de compreender a natureza e objetivo do estudo, inclusive os riscos e efeitos adversos e com intenção de cooperar com o Investigador e agir de acordo com os requerimentos de todo o ensaio, o que vem a ser confirmado mediante a assinatura do Termo de Consentimento Livre e Esclarecido.

Tabela 05: Classificação da obesidade segundo o índice de massa corpórea (IMC):\*

| IMC (Kg/m <sup>2</sup> ) | Classificação       | Obesidade grau |
|--------------------------|---------------------|----------------|
| < 18,5                   | Magro ou desnutrido | 0              |
| 18,5 – 24,9              | Normal              | 0              |
| 25 – 29,9                | Sobrepeso           | 0              |
| 30 – 34,9                | Obesidade           | I              |
| 35 – 39,9                | Obesidade           | II             |
| > 40                     | Obesidade grave     | III            |

\*WHO Consultation on Obesity. Preventing and Managing the global Epidemic. Geneva: World Health Organization, 1998.

#### 4.5. CRITÉRIOS DE EXCLUSÃO DO VOLUNTÁRIO

Os seguintes critérios excluirão o voluntário do estudo:

*Problemas relacionados com a droga:*

- O voluntário tem sabidamente hipersensibilidade à droga em estudo (isoniazida) ou a compostos quimicamente relacionados;
- Uso de terapia de manutenção com qualquer droga excetuando-se anticoncepcionais.

*Doenças ou problemas de saúde:*

- História ou presença de doenças hepáticas ou gastrointestinais ou outra condição que interfira com absorção, distribuição, excreção ou metabolismo da droga;
- História de doença renal, pulmonar, epiléptica, hematológica ou psiquiátrica; tom hipo ou hipertensão de qualquer etiologia que necessite de tratamento farmacológico; tem história ou teve infarto do miocárdio, angina e/ou insuficiência cardíaca;
- Achados eletrocardiográficos não recomendados a critério do Investigador Principal para participação no estudo;
- Os resultados dos exames laboratoriais estão fora dos valores considerados normais de acordo com as normas deste protocolo, a menos que sejam considerados clinicamente não significativos pelo Investigador.

*Hábitos e dependências:*

- - Tem história de abuso de álcool ou drogas ou consumo expressivo de álcool;
- Voluntários que estejam em dieta que possa afetar a farmacocinética da droga;
- O voluntário ingere mais do que 5 xícaras de café ou chá por dia.

*Condições encontradas nos dias/meses que antecedem o estudo:*

- Fez uso de medicação regular dentro das 2 semanas que antecederam o início do tratamento e a data de avaliação, ou fez uso de qualquer medicação dentro de uma semana, excetuando-se anticoncepcionais por via oral. O uso eventual de medicação, que a juízo do Investigador ou médico responsável não interfere na farmacocinética da droga não será considerado como critério de exclusão;
- Foi internado por qualquer motivo entre 8 semanas do início do primeiro período de tratamento deste estudo e a data da avaliação;
- Tratamento dentro dos 3 meses prévios ao estudo com qualquer droga conhecida de ter um potencial tóxico;
- O voluntário participou de qualquer estudo experimental ou ingeriu qualquer droga experimental dentro dos 6 meses que antecedem o início deste estudo e a data da avaliação;
- O voluntário doou ou perdeu 450 ml, ou mais de sangue dentro dos quatro meses que antecederam ao estudo ou doou mais de 1500 mL dentro dos 12 meses entre o início do tratamento do estudo e a data de avaliação.



*Outras condições:*

- História de reações adversas sérias ou hipersensibilidade a qualquer droga;
- Teste positivo de gravidez para as voluntárias mulheres;
- O voluntário tem qualquer condição que o impede de participar do estudo pelo julgamento do Investigador.

#### 4.6. CRITÉRIOS DE RETIRADA DO VOLUNTÁRIO

*Solicitação por parte do voluntário para se retirar do estudo a qualquer momento:*

- Voluntário não deseja continuar no estudo por razões pessoais (ou sem razão justificada);
- Voluntário não deseja continuar no estudo devido os eventos adversos da droga de estudo (efeitos não desejáveis possivelmente relacionados à droga em estudo);
- Voluntário não deseja continuar por razões outras que não efeitos adversos por exemplo indisponibilidade, intolerância nos procedimentos do estudo, ou mesmo vontade própria.

*O Investigador pode retirar o voluntário do estudo por uma das seguintes razões:*

- Resposta positiva à reavaliação de qualquer um dos critérios de exclusão, no momento da admissão ao primeiro período de tratamento ou em ocasião subsequente;
- Voluntários que vomitarem logo após a administração da medicação e/ou no tempo equivalente a duas vezes o  $T_{max}$  da droga em estudo;
- Não aderência às exigências do protocolo;
- Eventos adversos, sintomas ou sinais de possível toxicidade;
- Doença intercorrente requerendo medicação;
- Qualquer outra condição que, a juízo do Investigador, seja do interesse para manutenção da saúde do voluntário;
- Falta de mais de 10% dos valores das concentrações sanguíneas do fármaco provenientes da administração de cada medicamento por voluntário.

Os detalhes e razões da retirada do voluntário do estudo serão anotados no Formulário de Relato de Caso - CRF (Seção de Término do Estudo).

O voluntário será considerado um "Término Prematuro" caso venha a ser retirado ou retirou-se do estudo antes da administração da medicação.

No caso do voluntário ser retirado ou retirar-se do estudo após a administração da medicação, este será considerado um "Drop Out".

Para ser preservado o N do estudo, os "Términos Prematuros" na 1ª fase do estudo poderão ser substituídos por voluntários *stand by*. Os voluntários *stand by* caracterizam-se por fazer parte da seleção e estarem aptos para participar do estudo. Entretanto, a participação ocorre em caso de Término Prematuro na 1ª fase. Os voluntários *stand by* serão ressarcidos no valor de R\$ 100,00 (Cem reais) caso não participem do estudo devido ao tempo e transporte dispendidos.

O voluntário que assinou o TCLE e foi substituído pelo voluntário *stand by*, fará parte do estudo e portanto manterá seu número e a documentação arquivada com os demais voluntários.

#### 4.7. CRITÉRIOS PARA DESCONTINUAÇÃO DO VOLUNTÁRIO

Com o objetivo de garantir o bem estar dos voluntários, o estudo poderá ser interrompido caso, a juízo do Investigador Principal ou do Patrocinador, seja estabelecido que os riscos a que os voluntários estão sendo submetidos sejam superiores aos antecipadamente previstos ou mesmo, a qualquer momento pelo voluntário por decisão própria.

Além disso, os voluntários poderão ter sua participação no estudo encerrada antecipadamente em função dos "Critérios de Retirada" descritos no item 4.6 deste Protocolo.

### 5. EXECUÇÃO CLÍNICA DO ESTUDO

#### 5.1. Definição Dos Períodos Do Estudo

O Período pré-estudo dura desde um máximo de 30 dias antes da primeira administração pretendida da droga em estudo até o período 1 do estudo. Engloba as avaliações feitas durante o exame pré-estudo e o instante anterior à assinatura do Termo de Consentimento Livre e Esclarecido.

O Período 1 do estudo tem início com a assinatura do Termo de Consentimento Livre e Esclarecido dura até imediatamente antes da segunda administração pretendida da droga em estudo.

O Período 2 do estudo tem início com a segunda administração pretendida da droga e dura até a alta do voluntário no estudo.

#### 5.2. EXAMES PRÉ E PÓS-ESTUDO

##### 5.2.1 Exames pré-estudo

Os voluntários serão examinados antes da seleção, a fim de garantir que estejam clinicamente saudáveis. Os seguintes exames serão realizados durante os 30 dias anteriores à primeira administração da droga:

- Histórico do voluntário, inclusive histórico médico.
- Exame físico (inclusive ECG com 12 derivações, pressão sanguínea, temperatura corporal, frequência cardíaca, peso e altura).

Estudo: SPI 029/08, Isoniazida

Documento: Protocolo

Versão: Final

Data: 30 de Setembro de 2008

34 / 61

- Exames laboratoriais (sangue, urina e teste de gravidez ( $\beta$ HCG) para as mulheres).
- Bem-estar geral e uso de medicação.
- Teste de hálito (se houver suspeita de abuso de álcool).

### 5.2.2. Exames pós-estudo

O exame pós-estudo é realizado para verificar se o voluntário não apresenta nenhum sintoma de doença ou dano à saúde. O exame pós-estudo será realizado dentro de 10 dias após a coleta da última amostra de sangue para análise farmacocinética do segundo período.

- Exame físico (inclusive ECG com 12 derivações, pressão sangüínea, temperatura corporal, frequência cardíaca e peso).
- Exames laboratoriais sangue (incluindo  $\beta$  HCG nas mulheres) e urina, exceto sorologia.
- Bem estar geral e medicação concomitante.

Indivíduos que apresentem anormalidades subjetivas ou objetivas ao final do experimento serão alvo de acompanhamento. Qualquer EA que permaneça sem solução após o encerramento do experimento requer avaliação detalhada e acompanhamento até ser resolvido ou até que uma explicação razoável para sua persistência seja encontrada. Se o indivíduo recusar-se a seguir as instruções do Investigador, este estará liberado de responsabilidade.

Durante o exame pós-estudo, cada participante será orientado a não doar sangue por pelo menos 4 meses, nem participar, por um período mínimo de 6 meses após o estudo, de quaisquer estudos sobre drogas que impliquem na coleta de amostras de sangue.

## 6. LOCAL E FORMA DE CONFINAMENTO DOS VOLUNTÁRIOS

Os voluntários serão internados no Hospital Irmãos Pentecado que possui uma unidade para ensaios clínicos com leitos e posto de enfermagem. A enfermagem dispõe de carrinho de emergência com desfibrilador, monitor, material para pequena cirurgia e medicação de emergência para qualquer eventualidade. Além disso, dispõe de uma Unidade de Terapia Intensiva (UTI). Sua estrutura laboratorial possui equipamentos para processamento e armazenamento de amostras biológicas.

Será solicitado ao voluntário que se apresente na sede da Synchrophar, situada à Rua Engenheiro Cândido Gomide, 38, Campinas, até as 17:00 horas na noite anterior de cada período do estudo. Será realizada uma reunião com os voluntários com o intuito de esclarecer dúvidas sobre o estudo, sobre as internações, coletas externas e restrições. Os voluntários receberão o Termo de Consentimento Livre e Esclarecido (TCLE) para leitura. Em seguida, a enfermeira responsável lerá o TCLE para os voluntários, enfatizando os efeitos adversos que possam ocorrer e estimulando o voluntário a expor suas dúvidas. O médico estará disponível, no momento da assinatura do TCLE, caso o voluntário tenha dúvidas. Logo após, será realizada a verificação dos sinais vitais dos voluntários e depois

uma consulta médica. No momento da saída do voluntário será realizada uma vistoria dos pertences pessoais e separação destes não pertinentes à internação, com devolução ao final de cada internação. O grupo de voluntários então deve ser levado, sob responsabilidade e cuidados da Synchrophar, para internação no Hospital aproximadamente às 20:00 horas na noite anterior de cada período de tratamento, devendo permanecer na Unidade por 12 horas após a administração da medicação. Os voluntários terão assistência e cuidados especializados durante todos os períodos de tratamento, o que incluirá uma averiguação sumária de suas condições quando de seu confinamento e no momento da alta, de forma a possibilitar avaliar sua aderência aos quesitos deste protocolo.

## 7. CONDUTAS PERMITIDAS E NÃO PERMITIDAS ANTES E DURANTE O ESTUDO

- Durante as internações devem ser considerados os períodos de jejum, incluídas as restrições de líquidos. Também não é permitida a ingestão de qualquer outro alimento (incluindo doces, pastilhas, gomas, chicletes, pastilhas para garganta, salgadinhos ou biscoitos de qualquer tipo), além dos programados.
- Desde 24 horas antes da primeira coleta de sangue até o exame de acompanhamento, todos os esforços físicos tais como esportes e trabalho manual que exija muito esforço devem ser evitados.
- A ingestão de alimentos ou bebidas contendo álcool não é permitida a partir de 24 horas anteriores à primeira administração pretendida da droga em estudo até a última coleta de amostra de sangue para análise farmacocinética de cada período.
- Os voluntários devem jejuar pelo menos 08 horas antes da primeira coleta de sangue para medidas laboratoriais e pelo menos 08 horas antes de cada administração.
- A ingestão de produtos que contenham xantina (chocolate, chá preto e verde, café, bebidas de cola, goma de mascar, bebidas energéticas, etc.) não será permitida a partir de 12 horas anteriores à primeira administração pretendida da droga e até a última coleta de amostra de sangue para análise farmacocinética de cada período.
- A ingestão de alimentos ou bebidas que contenham pomelo, alimentos ou bebidas que contenham semente de papoula (pães, bolos e iogurtes com semente de papoula, etc.), a ingestão de couve de Bruxelas ou brócolis (conhecidos inibidores e indutores de CYP450), ameixa, framboesa e grape fruit não é permitida a partir de 7 dias antes da primeira administração pretendida da droga até a última coleta de amostra de sangue do último período.
- Reitera-se a proibição quanto ao uso de drogas e medicamentos, critérios de exclusão e desligamento do estudo.
- Caso, mesmo tomadas as devidas precauções, voluntárias do sexo feminino vicem a suspeitar de que engravidaram durante a participação no estudo, deverão imediatamente comunicar o ocorrido à equipe e deverão interromper sua participação. O fato deverá ficar devidamente documentado no Formulário de Relato de Caso (RCF).

A não observância destas restrições deve ser informada ao Investigador Principal, o qual irá decidir se será permitido que o voluntário permaneça no estudo. O fato e suas características deverão ser registrados no Formulário de Relato de Caso (CRF).

## 7.1. OUTRAS OBRIGAÇÕES E RESTRIÇÕES

- Os voluntários devem permanecer internados durante todo o tempo previsto (12 horas antes da administração do medicamento até 12 horas após), em cada internação. Devendo retornar à unidade ou ao hospital para coletas de amostra de sangue correspondente ao tempo de 24:00h após a administração da medicação;
- Voluntários devem retornar à Synchrophar a fim de se submeterem a um exame físico geral, eletrocardiograma e também para coleta de amostras (sangue e urina) para os testes laboratoriais. Esta obrigação é válida mesmo em caso de desistência do voluntário (a não ser que ele tenha desistido antes de tomar a medicação), já que está vinculada à avaliação de segurança do uso do medicamento;
- Os voluntários devem comunicar o não cumprimento de qualquer restrição mencionada.

## 7.2. HORÁRIOS DE JEJUM E DE ALIMENTAÇÃO

Ao chegar no Hospital Irmãos Pentecostei, os voluntários deverão fazer sua última refeição do dia. Após a sua entrada no hospital deverão permanecer em jejum a partir das 23:00 horas (pelo menos 08 horas de jejum) da noite da internação até 04 (quatro) horas após a ingestão da medicação, prevista para a manhã seguinte.

A fim de manter a padronização dos grupos de tratamento, a dieta (alimentos e líquidos) a ser oferecida obedecerá o mesmo padrão para todos os voluntários. Todos os alimentos e bebidas servidos devem ser ingeridos por completo. O cardápio é estipulado pela Synchrophar e a nutricionista do Hospital.

Alimentos (Tabela 5):

| Períodos 1 e 2           |                            |           |
|--------------------------|----------------------------|-----------|
| Tempo após administração | Refeição                   | Líquidos  |
| 10:00 – 12:00            | Jantar                     | Permitido |
| 00:00                    | Administração da medicação |           |
| 4:00 – 5:00              | Almoço                     | Permitido |
| 7:00 – 8:00              | Lanche da Tarde            | Permitido |
| 10:00 – 12:00            | Jantar                     | Permitido |

Líquidos:

A ingestão de líquidos *ad libitum* (à vontade) será permitida até 06 (seis) horas antes da administração da droga. Água e líquidos (sem cafeína) serão permitidos *ad libitum* após 02 (duas) horas da administração da dose.

Estudo: SP129/08\_Isoniazida

Documento: Protocolo

Versão: Final

Data: 30 de Setembro de 2008

Estão especificamente programadas as seguintes ingestões de líquido:

- 200 ml. de água mineral sem gás em temperatura ambiente junto com a medicação.

Jejum:

Os voluntários deverão permanecer em jejum a partir das 23:00 horas (pelo menos 08 horas de jejum antes da medicação) da noite da internação até 04 (quatro) horas após a ingestão da medicação.

Os voluntários não poderão tomar líquidos desde 06 (seis) horas pré-administração da medicação e até 02 (duas) horas após a ingestão da medicação, exceto nas ocasiões especificamente programadas.

### 7.3. CRONOGRAMA DE COLETA DAS AMOSTRAS

A coleta das amostras será feita através de cateter heparinizado introduzido em veia superficial do antebraço do voluntário. Após a coleta de cada amostra, o cateter será lavado com 1 mL de solução de heparina sódica em NaCl 0,9% estéril (10 U/ml.).

Após pelo menos 08 horas de jejum será feita uma coleta de sangue de 15 ml. para controle individual e curvas padrões. A coleta pré-dose será realizada no máximo até 30 minutos antes da administração da medicação. E após a administração da medicação serão iniciadas as coletas de sangue para análise farmacocinética da droga. No total serão coletadas 32 amostras de 7,5 ml. de sangue (16 em cada período do estudo) em tubos com Heparina. Um total de aproximadamente 300 ml. de sangue será coletado durante os dois períodos do estudo, incluindo o volume coletado para os exames laboratoriais pré e pós estudo. Os tempos de coleta são mostrados na tabela abaixo.

Tabela 6. Atividades do estudo e tempos de coleta de amostras para análise farmacocinética:

| Base do Estudo | TEMPOS DE COLETA  |   | Avaliação de Segurança | Volume Coletado | Volume Desprezado Após Centrifugação |
|----------------|-------------------|---|------------------------|-----------------|--------------------------------------|
|                |                   |   |                        | ml.             | mL (±)                               |
| Triagem        |                   |   |                        | 15              | -                                    |
| Períodos 1 e 2 |                   |   |                        |                 |                                      |
| Internação     | Dia               | d |                        |                 |                                      |
| Pool           | Após 8 h de jejum | h |                        | 15              | 7,5                                  |
| Pré-Dose       | -00:30            | h | PA, pulso, temperatura | 7,5             | 3,75                                 |
|                | 00:20             | h |                        | 7,5             | 3,75                                 |
|                | 00:40             | h |                        | 7,5             | 3,75                                 |
|                | 01:00             | h |                        | 7,5             | 3,75                                 |
|                | 01:20             | h |                        | 7,5             | 3,75                                 |

Estudo: SPI102B/00 Isoniazida

Documento: Protocolo

Versão: Final

Data: 30 de Setembro de 2003

|                         |       |   |                         |            |            |
|-------------------------|-------|---|-------------------------|------------|------------|
|                         | 01:40 | h |                         | 7,5        | 3,75       |
|                         | 02:00 | h | PA, pulso, temperatura. | 7,5        | 3,75       |
|                         | 02:30 | h |                         | 7,5        | 3,75       |
|                         | 03:00 | h |                         | 7,5        | 3,75       |
|                         | 03:30 | h |                         | 7,5        | 3,75       |
|                         | 04:00 | h |                         | 7,5        | 3,75       |
|                         | 05:00 | h |                         | 7,5        | 3,75       |
|                         | 06:00 | h | PA, pulso, temperatura. | 7,5        | 3,75       |
|                         | 08:00 | h |                         | 7,5        | 3,75       |
|                         | 12:00 | h | PA, pulso, temperatura  | 7,5        | 3,75       |
|                         | 24:00 | h |                         | 7,5        | 3,75       |
| Pós Estudo              |       |   |                         | 15         | -          |
| <b>Totais do Estudo</b> |       |   |                         | <b>270</b> | <b>135</b> |
| <b>Total Geral</b>      |       |   |                         | <b>300</b> | <b>135</b> |

Deverá ser registrado no CRF o tempo real absoluto de coleta da amostra de sangue usando-se um cronômetro com contagem iniciada no tempo 00:00h (administração da medicação). Também deverá ser registrado o tempo real absoluto da administração da medicação, para que se possa computar o intervalo real de tempo existente entre a administração da droga e as respectivas coletas. Eventuais perdas de coleta de amostras também deverão ser registradas. As amostras coletadas deverão permitir a identificação inequívoca do estudo, voluntário (código de identificação), período e horário de coleta. As amostras externas (coletas na Synchrophar ou no hospital) seguem o mesmo padrão, contudo, o relógio da Clínica é sincronizado com o do Hospital.

## 8. PROCESSAMENTO E ARMAZENAMENTO INICIAL DAS AMOSTRAS

Logo após a coleta (máximo de 45 minutos), as amostras de sangue serão centrifugadas em torax de 3.000 rpm (4°C) por 10 minutos. Imediatamente após a centrifugação, um mínimo de 1,5 mL de plasma, para cada amostra será transferido para o primeiro tubo criogênico de polipropileno e o plasma restante será transferido para um segundo tubo criogênico de polipropileno como uma amostra em duplicata. As amostras de plasma serão armazenadas em frascos adequadamente identificados, contendo o SPII do estudo, número do voluntário, tempo de coleta e fase do estudo. Sua temperatura será de -20°C em freezer específico para armazenagem de amostras biológicas, localizado na própria Unidade. - POP EC pro 10 Processamento, Armazenamento, Transporte e envio das Amostras (anexo 09).

### 8.1. ARMAZENAMENTO E TRANSPORTE DAS AMOSTRAS

Após o término do período de estudo, os frascos identificados individualmente serão embalados por voluntário e por período do estudo.

O transporte das amostras para o Centro analítico será feito em recipientes adequados, com gelo seco e em temperatura monitorada.

Depois de completada a etapa Analítica, as amostras restantes ficarão sob a responsabilidade e os cuidados da Synchrophar, por até 03 meses após a entrega do Relatório Final ao patrocinador. Após esse período, as amostras de backup retornam para o Centro Analítico.

## 9. AVALIAÇÃO DE SEGURANÇA

Para fins de acompanhamento de segurança, os voluntários serão observados durante o estudo visando a detecção de eventos adversos.

Um **Evento Adverso** é qualquer ocorrência médica não desejada em um sujeito que esteja participando de uma investigação clínica e que já tenha recebido alguma das *terapias* vinculadas à investigação. Esta ocorrência não necessita ter uma relação causal com a *terapia*. Um *Evento Adverso* pode portanto ser um sinal (incluindo achados anormais de exames ou sinais vitais) ou sintoma desfavorável e não intencional, ou uma doença temporaneamente associada à *terapia*, relacionada ou não à *terapia*.

Um **Evento Adverso Sêrio** é um *Evento Adverso* que, independente de dose:

- Provoca a morte;
- Ameaça a vida;
- Requer hospitalização ou prolongação da hospitalização;
- Resulta em debilidade / incapacitação significativa ou persistente;
- Trata-se de uma anomalia congênita ou defeito ao nascimento que não tinha sido diagnosticada.

A "ameaça à vida" refere-se a condições que efetivamente encontradas no momento da ocorrência do evento ou que ocorreram, também no momento do evento, intervenção para prevenir que haja "ameaça à vida"; não se refere à possibilidade de "ameaça à vida" caso o evento fosse mais intenso.

Se define como hospitalização a admissão em um centro hospitalar, mesmo que seja por um período inferior a 24 horas. Excluem-se as admissões a) para tratar de uma condição pré-existente que esteja documentada na história clínica e que tenham sido planejadas anteriormente ao estudo; b) devido a problemas sociais; c) contempladas no protocolo como parte dos procedimentos do estudo; d) eletivas (cirurgia estética).

Além da comunicação de eventos pelo voluntário ou simples observação, o investigador deverá registrar e avaliar as seguintes variáveis, visando a detecção de eventos adversos:

- Sinais vitais dos voluntários (FC, PA e temperatura) obtidos durante as internações;
- Resultados dos exames laboratoriais (hematologia, bioquímica e análise de urina) e eletrocardiograma, obtidos ao final do estudo e avaliados de forma comparativa àqueles obtidos na fase de seleção dos voluntários.
- Achados de exame físico, obtidos ao final do estudo e avaliados de forma comparativa àqueles obtidos na fase de seleção dos voluntários.

Estudo: SPII29/08\_isoniazida

Documento: Protocolo

Versão: Final

Data: 30 de Setembro de 2008



## 9.1. REGISTRO E ANÁLISE DOS PARÂMETROS DE SEGURANÇA

### *Procedimentos durante o estudo:*

Nos dias de administração da medicação, em cada período de tratamento, os voluntários permanecerão internados durante as horas subsequentes à administração dos medicamentos e serão observados pelos profissionais de saúde durante todo o estudo visando a detecção de eventos adversos incluindo sinais de toxicidade.

Os voluntários deverão estar instruídos sobre os efeitos adversos em potencial, bem como sobre a necessidade de comunicá-los imediatamente ao investigador ou sua equipe. Quaisquer eventos adversos que ocorram após o período sob supervisão médica direta deverão ser imediatamente comunicados à equipe, por telefone.

Serão monitoradas, por ocasião das coletas de sangue, a frequência cardíaca e pressão arterial do voluntário. A temperatura corpórea também será acompanhada a partir da administração da medicação, de acordo com a tabela de atividades do estudo (tabela 06).

Um médico da equipe estará disponível durante todo o período do estudo.

### *Procedimentos pós estudo:*

Na alta da última internação, todos os voluntários serão novamente avisados de que não devem doar sangue por pelo menos 4 meses ou participar de qualquer estudo clínico com medicamentos que envolva a coleta de amostra por pelo menos 6 meses.

Todos os voluntários, inclusive os que desistiram da participação no estudo após a administração de pelo menos uma dose de um dos medicamentos, deverão ser reavaliados clinicamente (incluindo sinais vitais, exame físico e ECG) e por exames laboratoriais subsidiários iguais aos realizados na fase pré-estudo (executando-se testes sorológicos).

Esta reavaliação deverá ocorrer até 10 dias após a última coleta de sangue. Independentemente de alteração, todos os resultados obtidos devem ser relatados nos CRF individuais correspondentes.

A negativa ou o não comparecimento do voluntário para a realização destes procedimentos, deverá ser devidamente documentada.

## 9.2. PROCEDIMENTOS PARA REGISTRAR E COMUNICAR EVENTOS ADVERSOS E DOENÇAS INTERCORRENTES

As perguntas realizadas para saber se o voluntário teve algum evento adverso deverão ser limitadas a perguntas gerais, tais como: "Como vai você?"

Será solicitado aos voluntários que relatem qualquer evento adverso e quando isto ocorreu. Será também solicitado que notifique ao investigador se foi necessário usar medicação adicional.

Qualquer evento adverso deverá ser registrado em detalhes na(s) folhas(s) apropriada(s) para relato de eventos adversos, integrante do Formulário de Relato de Caso (CRF). Os detalhes incluem a descrição do evento utilizando terminologia médica precisa, informação sobre a o momento em que começou, sua duração e as ações médicas tomadas para afastar o evento

adverso, bem como informações sobre o defeito e qualquer outro dado adicional que a julgo do Investigador possa ser relevante.

Devem ser empreendidos todos os esforços pelo Investigador Principal para explicar cada experiência adversa e avaliar sua relação, se houver, com o medicamento do estudo.

O Investigador Principal é responsável por documentar todos os eventos adversos que ocorram durante o estudo e comunicar oportunamente estes eventos ao patrocinador. O Investigador Principal é responsável pela notificação dos Eventos Adversos Sérios à pessoa indicada pelo patrocinador para tomar conta dos relatórios de Eventos Adversos Sérios. Todos os casos de emergência deverão também ser imediatamente comunicados aos monitores.

Para questionamentos sobre Eventos Relacionados ao Sistema Digestório, deve-se preencher o Anexo 06.

Tabela 07- Questionamento de EAs e Eventos Relacionados ao Sistema Digestório

| Tempo (hh:mm) | Questionamento de Eventos Relacionados ao Sistema Digestório |
|---------------|--------------------------------------------------------------|
| -00:30        |                                                              |
| 00:20         |                                                              |
| 00:40         |                                                              |
| 01:00         |                                                              |
| 01:20         |                                                              |
| 01:40         |                                                              |
| 02:00         | X                                                            |
| 02:30         |                                                              |
| 03:00         |                                                              |
| 03:30         |                                                              |
| 04:00         |                                                              |
| 05:00         |                                                              |
| 06:00         |                                                              |
| 08:00         |                                                              |
| 12:00         |                                                              |
| 24:00         |                                                              |

### 9.3. ACOMPANHAMENTO DOS VOLUNTÁRIOS APÓS EVENTOS ADVERSOS

É de responsabilidade do Investigador garantir que os voluntários envolvidos recebam um tratamento definitivo para qualquer evento adverso, se necessário. Os eventos deverão ser seguidos clinicamente e por análises laboratoriais (quando indicados) até que os parâmetros voltem ao normal. Estas atividades podem permanecer mesmo após o estudo ter sido completado.

A equipe da Unidade Clínica deverá monitorar a segurança dos voluntários desde a ocorrência de um Evento Adverso até a recuperação satisfatória. Portanto, podem ser necessárias visitas de retorno e testes laboratoriais (quando apropriado), mesmo depois que o estudo tenha sido completado e que tenha ocorrido a alta da Unidade Clínica.

Estudo: SPH29/08 Isoniazida

Documento: Protocolo

Versão: Final

Data: 30 de Setembro de 2008

Em casos de emergência a unidade de internação tem local próprio, equipado com desfibrilador, monitor, material para pequena cirurgia e com medicação de urgência para qualquer eventualidade. Além disso, contam com Unidade de Terapia Intensiva (UTI).

#### *Medidas em caso de Eventos Adversos e SSPT sérios*

EAAs devem ser documentados em detalhe no formulário de EA além da documentação regular no CRF.

A Synchrophar vai fornecer relatórios de EAAs ao patrocinador dentro de no máximo 24 horas após seu início.

O Comitê de Ética em Pesquisa deve ser informado sobre a ocorrência de EA sério até 48 horas após seu início. Telefone CEP (19) 3521-8941.

Uma notificação do EA Sério deve ser enviada aos setores de Farmacovigilância – Unidade de Farmacovigilância – NUVIG/ANVISA, e à Coordenação de Inspeção em Centros de Equivalência Farmacêutica e Bioequivalência - CIBIO/GGMED/ANVISA no prazo de 48 horas após seu início. Telefone ANVISA 55 (61) 3562-5562.

EAAs que, segundo o conhecimento atual, possam ser causados pela droga em estudo requerem avaliação médica imediata. A decisão da finalização do estudo completo será tomada na base desta avaliação e segundo o *ICH Guideline for Clinical Safety Data Management: Definitions and Standards for Expedited Reporting* e pelos requisitos legais dos países envolvidos.

O Comitê de Ética apropriado deve ser informado caso os EAs

- sejam sérios e relacionados, ou
- sejam inesperados e possam prejudicar a segurança dos participantes ou a condução do estudo.

O patrocinador deve expedir relatórios de todos os EAAs sérios, suspeitos ou inesperados a todos os Investigadores/instituições relacionados e às autoridades regulatórias. O envio de relatórios deve obedecer aos requerimentos regulatórios descritos pela ANVISA via fax (55-61-3448-1275) e os procedimentos descritos pelo *ICH Guideline for Clinical Safety Data Management: Definitions and Standards for Expedited Reporting*.

#### **9.4. PROCEDIMENTOS PARA MONITORAR A ADESÃO DO VOLUNTÁRIO AO PROTOCOLO**

##### *Adesão à Terapia:*

Os medicamentos sob investigação (e outras terapias) serão administrados na presença de um médico responsável pelo plantão da Synchrophar. O administrador deverá examinar a boca de cada voluntário após ingestão do medicamento.

##### *Adesão a outras condições / restrições:*

A adesão às restrições quanto ao uso de medicamentos, limitações dietéticas e demais restrições definidas no Protocolo serão investigadas inicialmente através de questionamento ou observação direta por parte do Investigador e equipe participante da etapa clínica do estudo no momento da internação ou antes da administração do medicamento, e por observação direta durante o período de internação.

Deverá ser especificamente investigado (por ocasião da primeira ou demais internações) se o voluntário:

- Fez uso de qualquer medicamento durante os 14 dias que precederam a internação ou durante o intervalo entre as internações;
- Foi hospitalizado dentro de 8 semanas que antecederam o estudo;
- Por qualquer motivo, doou ou perdeu sangue dentro dos 4 meses que antecederam ao estudo;
- Suspeita de estar ou se encontra grávida;
- Estar amamentando;
- Fez uso de cafeína ou produtos que contenham xantina (chocolate, chá, café, colas, etc.) nas 12 horas anteriores a administração pretendida da medicação até a última coleta de sangue;
- Fez uso de álcool 24 horas anteriores à primeira administração pretendida até a última coleta de sangue;
- Fez uso de drogas psicotrópicas durante os 14 dias que precederam a internação ou durante o intervalo entre as internações;
- Fez alguma exercício físico intenso nas 24 horas anteriores a primeira coleta de sangue até o exame de acompanhamento;
- Deixou de cumprir com as restrições de jejum estabelecidas.

Se houver qualquer dúvida sobre o uso de álcool, poderá ser feito um teste para detecção de álcool, a juízo do Investigador.

## 10. RISCOS RELACIONADOS COM A PARTICIPAÇÃO DO ESTUDO

### 10.1 RISCOS RELATIVOS AO PROCEDIMENTO

O uso de uma cânula interna para fins de amostragem de sangue pode ser acompanhado por leve contusão e também, em raros casos, por inflamação passageira da parede da veia. Após a irritação inicial, a presença de uma cânula interna é, em geral, indolor e praticamente não é notada. O mesmo se aplica à punção da veia para amostragem de sangue posterior.

O volume total de sangue retirado durante todo o estudo será de aproximadamente 300 mL (240 mL para caracterização farmacocinética + 30 mL para exames pré-estudo e pós-estudo + 15 mL de pool para cada período) dentro de, aproximadamente, 4 semanas. Não é esperado nenhum risco relativo à segurança, devido a essa retirada de sangue.

### 10.2 RISCOS RELATIVOS ÀS DROGAS EM INVESTIGAÇÃO

Os riscos relativos à droga em investigação são: anemias, agranulocitose, trombocitopenia e eosinofilia. Menos de 1% dos pacientes apresentam reações cutâneas, incluindo urticária, púrpura, lúpus eritematoso e dermatite exfoliativa.

Neuropatia periférica é o efeito tóxico mais comum. Outros efeitos neurotóxicos incomum com doses convencionais são: convulsões, encefalopatia tóxica, neurite, prejuízo de memória, e psicose tóxica.

Efeitos hepáticos como elevação das Transaminases (SGOT; SGPT), bilirrubinemia, bilirrubinúria, icterícia ocasionalmente severo e às vezes hepatite fatal. Também foram relatadas agranulocitose, eosinofilia, trombocitopenia, anemia hemolítica, sideroblástica, ou aplástica.

Outros efeitos adversos incluem: náuseas, vômito, boca seca, constipação, febre, vertigem, vasculite, hiperreflexia, retenção de urina e ginecomastia.

Medidas especiais de precaução não são consideradas como necessárias para este estudo. Em caso de emergência, procedimentos padrão de emergência serão empregados. O Investigador Principal deverá ser imediatamente consultado e informado.

O Investigador Principal providenciará todo o equipamento de emergência necessário e pessoal especialmente treinado para lidar com eventos de emergência durante este estudo.

Todos os casos de emergência (i.e. ocorrência de EAS e/ou aumento do número de EAs, o que pode resultar numa relação inaceitável da relação de risco-benefício) devem ser relatados imediatamente ao Investigador Principal e serão anotados no CRF.

## **11. IDENTIFICAÇÃO DOS DADOS A SEREM REGISTRADOS DIRETAMENTE NO FORMULÁRIO DE RELATO DE CASO (CRF)**

Os seguintes dados serão registrados diretamente no CRF, sendo este a fonte de dados brutos:

- Exame físico, incluindo a história médica;
- Dados antropométricos;
- Sinais Vitais;
- Uso de medicamentos pré ou concomitantemente ao tratamento;
- Administração dos produtos sob investigação e respectivos horários;
- Controle dietético e ingestão de líquidos;
- Horários de coleta das amostras de sangue;
- Registro de Eventos Adversos e Eventos Adversos Sérios.

Nos CRF cada voluntário será identificado pela inicial do primeiro nome, inicial do sobrenome, data do nascimento seguido de F (para feminino) ou M (para masculino).

Exemplo: José Roberto Silveira, DN 20/04/1965 - JS200465M

Esta identificação deverá constar em cada página do CRF do respectivo voluntário.

### **11.1. TRATAMENTO DE DOCUMENTAÇÃO DE DADOS CLÍNICOS**

A inserção de dados clínicos nos documentos fonte deve ser feita com caneta esferográfica de tinta preta e devem ser legíveis. Não serão usados lápis e líquidos para correção. Caso sejam necessárias correções, elas serão inseridas por um participante da equipe de estudo da seguinte maneira: a informação errada será riscada, devendo, no entanto, permanecer legível e a informação correta será colocada no campo de correções (se aplicável) ou ao lado da  
Estudo: SPH29/08, Isoniazida

Documento: Protocolo

Versão: Final

Data: 30 de Setembro de 2008

informação incorreta. Correções serão rubricadas e datadas. Para correções relativas à EAs ou a uma variável primária, deverá ser fornecida uma razão. Para os propósitos de controle de qualidade, o Investigador Principal fará um controle dos dados nos arquivos de dados fonte para correção formal, completitude e entendimento das entradas.

Para fins de controle de qualidade, o Investigador verificará os dados dos documentos fontes quanto à exatidão formal, integridade e legibilidade das inserções. Em seguida, o documento fonte em português será bloqueado, de modo que inserções e / ou correções subsequentes possam ser identificadas.

Ao final da Etapa Clínica os dados dos documentos fontes serão inseridos no Software SCPDM.

## 12. ÉTICA

### 12.1. COMITÊ DE ÉTICA EM PESQUISA

O projeto de pesquisa, com o protocolo experimental e o termo de consentimento, serão submetidos ao Comitê de Ética em Pesquisa da UNICAMP - credenciado pelo CONEP - Conselho Nacional de Saúde/MS.

O ensaio não será iniciado antes que exista um Protocolo escrito e aprovado pelo Comitê de Ética. O Investigador será responsável por obter aprovação do Protocolo de Estudo pelo Comitê de Ética. Uma cópia da aprovação deverá ser enviada ao patrocinador, antes do início do estudo.

Se eventuais emendas ao Protocolo alterarem o risco potencial de segurança dos voluntários do ensaio (tais como mudança no regime de dosagem, amostras adicionais de sangue), será necessário submetê-las à aprovação por escrito pelo comitê. As emendas só poderão ser implementadas após sua aprovação pelo CEP, o que poderá implicar a interrupção temporária do estudo. Deverá ser fornecida ao patrocinador uma cópia da carta de aprovação cobrindo tais alterações.

### 12.2. CONDUTA DO ESTUDO

O Estudo será conduzido de acordo com:

- Declaração de Helsinki.
- ICH Topic E 6: Note for Guidance on Good Clinical Practice (CPMP/ICH/135/95), Julho 2002.
- ICH Topic E 3: Note for Guidance on Structure and Content of Clinical Study Reports, Step 4 (CPMP/ICH/137/95).
- GMP regulation, Annex 13, Julho 2003.
- Note for Guidance on Non-Clinical Safety Studies for the Conduct of Human Clinical Trials for Pharmaceuticals (CPMP/ICH/286/95, modification), Novembro 2000.
- Note for Guidance on the Investigation of Bioavailability and Bioequivalence (CPMP/EWP/QWP/1401/98).
- Resolução 196/96 – Pesquisas Envolvendo Seres Humanos, ANVISA, Ministério da Saúde, Brasil (RES 196/96/MS/CNS).

Estudo SPH29/08\_Isoniazida

Documento: Protocolo

Versão: Final

Data: 30 de Setembro de 2008

- Resolução 251/97 – ANVISA, Ministério da Saúde, Brasil (RES 251/97/MS/CNS)
- Resolução 1170/06 – Anvisa, Ministério da Saúde, Brasil (RES 1170/06/MS/CNS).
- Guidance for Industry, Bioanalytical Method Validation, U.S. Department of Health and Human Services, Food and Drug Administration, Center for Drug Evaluation and Research (CDER), Center for Veterinary Medicine (CVM), Maio de 2001.

### 12.3 TERMO DE CONSENTIMENTO LIVRE E ESCLARECIDO

Os voluntários receberão uma explicação da natureza e dos objetivos do estudo. Será enfatizado que o estudo tem a finalidade de pesquisa, e que o voluntário não poderá esperar que haja qualquer efeito terapêutico. O voluntário também entenderá que ele/ela é livre para se retirar a qualquer momento do estudo sem ser obrigado a fornecer o motivo de fazê-lo e sem que isto cause qualquer prejuízo no seu atendimento junto a Synchrophar.

A participação dos voluntários nas atividades de recrutamento e seleção será acompanhada de autorização prévia conforme o Termo de Recrutamento anexo. Uma vez aprovada a participação do voluntário no estudo, será solicitado a cada voluntário que, caso concorde, assine o Termo de Consentimento para participar no estudo, antes da admissão no primeiro período de tratamento. A obtenção da assinatura do Termo de Consentimento, será realizada por um profissional qualificado, que tenha conhecimento amplo do protocolo.

Se, a julgo do Investigador Principal, uma emenda ao Protocolo alterar substancialmente o desenho do estudo ou o risco a que os voluntários estão submetidos, os voluntários serão informados e deverão assinar um novo consentimento relativo à decisão de continuar a participar no estudo.

### 12.4 CONFIDENCIALIDADE

Os resultados do exame médico e testes laboratoriais serão registrados no Formulário de Relato de Caso (CRF) de cada voluntário. Toda a informação obtida durante o estudo referente ao estado de saúde do voluntário estará disponível aos médicos da unidade de internação, cuja obrigatoriedade de manutenção do sigilo é inerente a sua função.

Uma cópia dos exames laboratoriais realizados no pré e pós-estudo será fornecida aos voluntários, caso seja solicitado.

### 12.5 RESSARCIMENTO

Os voluntários serão ressarcidos no valor de R\$ 440,00 (Quatrocentos e quarenta reais) relativo às despesas e tempo despendidos durante o estudo. A desistência ou dispensa do voluntário antes do comparecimento para a primeira internação não dá direito a ressarcimento. Caso o voluntário desista em uma das internações e/ou não compareça as coletas externas, será excluído do estudo e o ressarcimento não será efetuado (Resolução 1170 item 3.1.3). Caso o voluntário seja dispensado antes do estudo ser finalizado, receberá no final do estudo, o valor proporcional ao tempo despendido. O ressarcimento será efetuado após a consulta de alta. Caso o voluntário não compareça no dia da alta, será

realizado 03 contatos. Se o mesmo não comparecer nas datas agendadas, o processo será finalizado, e o ressarcimento cancelado.

A participação do voluntário no processo de seleção, independente de aprovação ou concordância em participação, não será ressarcida.

## 12.6 FINANCIAMENTO E SEGURO

Durante um período de 06 meses, a partir da data de início do estudo clínico, os voluntários estarão sob cobertura de um Seguro de Vida em Grupo da Mongeral S/A Seguros e Previdência, para casos de morte, invalidez permanente e acidentes relacionados ou não ao ensaio clínico.

Os acordos financeiros relativos ao estudo são fornecidos em separado.

## 12.7 MANUSEIO DOS DADOS E MANUTENÇÃO DOS REGISTROS

O Investigador deve manter todos os documentos relacionados com este estudo pelo tempo definido nas diretrizes da e ICH-GCP. Todos os dados e documentos devem estar disponíveis caso seja solicitado pelo patrocinador ou autoridades. Os documentos serão conservados por um período mínimo de 15 (quinze) anos.

Antes da remoção ou destruição dos documentos deste estudo, o Investigador deve informar ao Patrocinador, por escrito, sob suas intenções. Somente após obter uma permissão por escrito é que o Investigador poderá remover ou destruir os documentos do estudo.

O Patrocinador deve também manter todos os documentos relacionados ao estudo, por um período de pelo menos 15 (quinze) anos ou durante o tempo em que o medicamento encontrar-se no mercado.

## 13. ETAPA ANALÍTICA E AVALIAÇÃO FARMACOCINÉTICA

### 13.1 DETERMINAÇÃO DO PERFIL FARMACOCINÉTICO DA DROGA

Para fins de avaliação do perfil farmacocinético, além da quantificação da concentração plasmática do fármaco inalterado, é essencial o registro, durante os períodos de tratamento, do intervalo de tempo entre a coleta da amostra e a administração da droga ao voluntário. Para tanto deverão ser registrados para cada voluntário os horários reais de administração das drogas e o horário de coleta de cada amostra, identificando-se também o período do estudo a que se refere.

### 13.2 MÉTODOS DE OBTENÇÃO E REGISTRO DO MATERIAL PARA QUANTIFICAÇÃO DA DROGA

A definição do número e intervalo de obtenção das amostras para construção das curvas concentração *versus* tempo é função do perfil farmacocinético da droga, com base na informação de literatura, visando permitir o cálculo dos parâmetros farmacocinéticos



estipulados no item 15.1 deste protocolo. Para tanto, o tempo de coleta das amostras deverá estender-se por um prazo no mínimo 3 vezes superior à  $\frac{1}{2}$  vida da droga.

A definição do volume de sangue a ser coletado depende fundamentalmente das características impostas pelo método analítico a ser empregado, características de estabilidade da droga, bem como os aspectos regulamentares relacionadas à avaliação proposta.

#### 14. MÉTODO ANALÍTICO E VALIDAÇÃO

As concentrações plasmáticas de Isoniazida serão dosadas por método analítico específico e validado, baseado na aplicação da cromatografia líquida de alta eficiência acoplada à espectrometria de massas (LC/MS/MS). O relatório de validação do método, bem como sua descrição serão fornecidos por ocasião da conclusão do estudo.

##### 14.1 VALIDAÇÃO PRÉ-ESTUDO

###### Especificidade

Deve-se analisar amostras da matriz biológica obtidas de seis indivíduos, sendo quatro amostras normais, uma lipêmica e uma hemolisada, sob condições controladas referentes ao tempo, alimentação e outros fatores importantes para o estudo. Cada amostra branca deve ser testada utilizando o procedimento e as condições cromatográficas propostas. Os resultados devem ser comparados com aqueles obtidos com solução aquosa do analito, em concentração próxima ao LIQ.

Qualquer amostra branca que apresentar interferência significativa no tempo de retenção do fármaco, metabólito ou padrão interno, deve ser rejeitada. Caso uma ou mais das amostras analisadas apresentarem tal interferência, novas amostras de outros seis indivíduos devem ser testadas. Caso uma ou mais das amostras deste grupo apresentarem interferência significativa no tempo de retenção do fármaco, o método deve ser alterado visando eliminá-la.

Os interferentes podem ser componentes da matriz biológica, metabólitos, produtos de decomposição e medicamentos utilizados concomitantemente ao estudo. A interferência da nicotina, cafeína, produtos de venda isenta de prescrição e metabólitos deve ser considerada sempre que necessário.

Caso o método seja destinado à quantificação de mais de um fármaco, cada um deve ser injetado separadamente para determinar os tempos de retenção individuais e assegurar que impurezas de um fármaco não interfiram na análise do outro.

A resposta de picos interferentes no tempo de retenção do fármaco deve ser inferior a 20% da resposta do LIQ. As respostas de picos interferentes no tempo de retenção do fármaco e do padrão interno devem ser inferiores, respectivamente, a 20% e 5% da resposta na concentração utilizada.

### Curva de calibração/linearidade

A curva de calibração representa a relação entre a resposta do instrumento e a concentração conhecida do analito. Deve-se gerar uma curva de calibração para cada fármaco e corrida analítica, a qual será usada para calcular a concentração do fármaco nas amostras, utilizando-se a mesma matriz biológica proposta para o estudo. A curva de calibração deve incluir a análise da amostra branco (matriz biológica isenta de padrão do fármaco e do padrão interno), da amostra zero (matriz biológica mais o padrão interno) e de, no mínimo, 6 (seis) amostras contendo padrão do fármaco e padrão interno, contemplando o limite de variação esperado, do LIQ até 120% da concentração mais alta que se pretende analisar.

Para a determinação da curva de calibração, deve-se analisar amostras extraídas da matriz apropriada, no mínimo 6 (seis) concentrações diferentes. Procedimentos alternativos devem ser justificados, como na obtenção de uma correlação não-linear, em que um maior número de concentrações de padrões serão necessários.

Os resultados devem ser analisados por métodos estatísticos apropriados como, por exemplo, o cálculo de regressão linear pelo método dos mínimos quadrados. Deve-se apresentar as curvas obtidas (experimental) e a resultante do tratamento matemático), o coeficiente de correlação linear, o coeficiente angular e o intercepto da reta.

CrITÉRIOS de aceitação da curva de calibração:

- Desvio menor ou igual a 20% (vinte por cento) em relação à concentração nominal para o LIQ;
- Desvio menor ou igual a 15 % (quinze por cento) em relação à concentração nominal para as outras concentrações da curva de calibração;
- No mínimo quatro de seis concentrações da curva de calibração devem cumprir com os critérios anteriores, incluindo o LIQ e a maior concentração da curva de calibração;
- O coeficiente de correlação linear deve ser igual ou superior a 0,98.

### Precisão

A repetibilidade do método é verificada utilizando-se, no mínimo, 3 (três) concentrações (baixa, média e alta), contemplando a faixa de variação do procedimento, realizando-se, no mínimo, 5 (cinco) determinações por concentração.

A precisão deve ser determinada em uma mesma corrida (precisão intra-corrída) e em corridas diferentes (precisão inter-corrídas).

Pode ser expressa como desvio padrão relativo (DPR) ou coeficiente de variação (CV%), não se admitindo valores superiores a 15%, exceto para o LIQ, para o qual se admite valores menores ou iguais a 20%, segundo a fórmula:

Estudo: SPH20/08\_Isoniazida

Documento: Protocolo

Versão: Final

Data: 30 de Setembro de 2008

$$DPR = \frac{DP}{CMD} \times 100$$

Onde, D P é o desvio padrão e C M D, a concentração média determinada.

#### Exatidão

A exatidão do método deve ser determinada utilizando-se, no mínimo, 3 (três) concentrações (baixa, média e alta), contemplando a faixa de variação do procedimento, realizando-se, no mínimo, 5 (cinco) determinações por concentração.

A exatidão deve ser determinada em uma mesma corrida analítica (exatidão intra-corrída) e em corridas diferentes (exatidão inter corridas).

O desvio não deve exceder 15%, exceto para o limite de quantificação, para o qual se admite desvios menores ou iguais a 20%.

A exatidão é expressa pela relação entre a concentração média determinada experimentalmente e a concentração teórica correspondente:

$$\text{Exatidão} = \frac{\text{Concentração média experimental}}{\text{Concentração teórica}} \times 100$$

#### Limite inferior de quantificação (LIQ)

Estabelecido por meio da análise de matriz biológica contendo concentrações decrescentes do fármaco até o menor nível quantificável com precisão e exatidão aceitáveis.

Pode-se, também, utilizar a razão de 5:1 entre o sinal e o ruído da linha de base, devendo-se especificar o método utilizado para determinação do LIQ.

O LIQ deve ser, no mínimo, cinco vezes superior a qualquer interferência da amostra branco no tempo de retenção do fármaco.

O pico de resposta do fármaco no LIQ deve ser identificável e reproduzível com precisão de 20% (vinte por cento) e exatidão de 80 - 120 % (oitenta a cento e vinte por cento), através da análise de, no mínimo, 5 (cinco) amostras de padrões.

#### Limite de detecção (L.D.)

Estabelecido por meio da análise de soluções de concentrações conhecidas e decrescentes do fármaco, até o menor nível detectável. Recomenda-se que o L.L.D seja de 2 a 3 vezes superior ao ruído da linha de base.

### Recuperação

A recuperação mede a eficiência do procedimento de extração de um método analítico dentro de um limite de variação. Porcentagens de recuperação do analito e do padrão interno próximos a 100% são desejáveis, porém, admitem-se valores menores, desde que a recuperação seja precisa e exata.

Este teste deve ser realizado comparando-se os resultados analíticos de amostras extraídas a partir de três concentrações (baixa, média e alta), contemplando a faixa de linearidade do método, com os resultados obtidos com soluções padrão não extraídas, que representam 100% de recuperação.

O cálculo da recuperação deve ser feito em função da relação de área do padrão extraído e não extraído, tanto para o analito quanto para o padrão interno separadamente.

### Controle de qualidade (CQ)

CQ do limite inferior de quantificação (CQ-LIQ): mesma concentração de LIQ.

- CQ de baixa concentração (CQB): menor ou igual  $3 \times \text{LIQ}$ .
- CQ de média concentração (CQM): aproximadamente a média entre CQB e CQA
- CQ de alta concentração (CQA): 75 a 90% da maior concentração da curva de calibração.

### Estudo de estabilidade do fármaco em líquidos biológicos:

Para considerações específicas relevantes à realização do estudo de estabilidade devem ser observados os parâmetros de exatidão, precisão, linearidade, limite de detecção, limite de quantificação, especificidade, limite de variação e robustez, previamente validados. A estabilidade do fármaco em líquidos biológicos depende de suas propriedades químicas, da matriz biológica e do material de acondicionamento utilizado. A estabilidade determinada para um tipo de matriz e de material de acondicionamento específico não pode ser extrapolada para outros.

As condições de realização dos ensaios de estabilidade devem reproduzir as reais condições de manuseio e análise das amostras. Deve ser avaliada a estabilidade do analito durante a coleta e manuseio da amostra, após armazenagem de longa duração (congelamento) e curta duração (à temperatura ambiente), após ciclos de congelamento e descongelamento e nas condições de análise. Deve-se incluir também avaliação da estabilidade do analito nas soluções-padrão, preparadas com solvente apropriado em concentrações conhecidas. As determinações de estabilidade devem utilizar um conjunto de amostras, preparadas a partir

de uma solução estoque recente do fármaco em análise, adicionado à matriz biológica isenta de interferência.

#### Estabilidade após ciclos de congelamento e descongelamento

Deve-se testar a estabilidade do fármaco após três ciclos de congelamento e descongelamento, utilizando-se, no mínimo, três amostras das concentrações baixa e alta determinadas na validação do método analítico, nas seguintes condições: as amostras devem ser congeladas à temperatura indicada para o armazenamento e mantidas por 24 horas, sendo então submetidas ao descongelamento à temperatura ambiente. Quando completamente descongeladas, as amostras devem ser novamente congeladas à temperatura indicada para o armazenamento, por 12 a 24 horas e, assim sucessivamente, até contemplar os três ciclos, quantificando-se o fármaco nas amostras após o terceiro ciclo. Os resultados devem ser comparados com aqueles obtidos da análise das amostras recém-preparadas.

#### Estabilidade de curta duração

Para verificação dessa estabilidade utilizam-se, no mínimo, três amostras das concentrações baixas e altas determinadas na validação do método analítico. Cada uma delas deverá permanecer à temperatura ambiente de 4 (quatro) a 24 (vinte e quatro) horas (baseado no tempo em que as amostras do estudo serão mantidas à temperatura ambiente) e analisadas. Os resultados devem ser comparados com aqueles obtidos da análise das amostras recém-preparadas.

#### Estabilidade de longa duração

O tempo de armazenamento para o estudo de estabilidade de longa duração deve exceder o intervalo de tempo compreendido entre a coleta da primeira amostra e a análise da última, de acordo com o cronograma apresentado no protocolo de estudo de biodisponibilidade relativa/bioequivalência.

A temperatura utilizada no ensaio deve reproduzir a recomendada para armazenamento das amostras, normalmente igual a -20 °C.

Para verificação dessa estabilidade utilizam-se, no mínimo, três amostras das concentrações baixas e altas determinadas na validação do método analítico. As concentrações de todas as amostras de estabilidade devem ser comparadas com a média dos valores anteriormente calculados para as amostras do primeiro dia do teste.

#### Estabilidade pós-processamento

Em caso de utilização de equipamentos que empregam sistemas automáticos de amostragem/injeção, deve-se realizar estudo de estabilidade do fármaco, na amostra processada para análise, incluindo o adrião interno, na temperatura sob a qual o teste será realizado e por período de tempo superior à duração da corrida analítica. Utiliza-se, no mínimo, três amostras das concentrações baixa e alta determinadas na validação do método analítico. Os resultados devem ser comparados com aqueles obtidos da análise das amostras recém-preparadas.

Estudo: SPH29/08\_Isoniazida

Documento: Protocolo

Versão: Final

Data: 30 de Setembro de 2008

#### Estabilidade das soluções-padrão

Deve ser avaliada a estabilidade das soluções-padrão do fármaco e do padrão interno, mantidas à temperatura ambiente por, no mínimo, 6 (seis) horas após preparação.

Em caso de tais soluções serem armazenadas sob refrigeração ou congelamento, a estabilidade também deve ser avaliada, contemplando a temperatura e o período de armazenamento das mesmas.

Os resultados desse teste devem ser comparados com aqueles obtidos utilizando-se soluções recentemente preparadas do fármaco e do padrão interno.

**Análise dos resultados** As amostras serão consideradas estáveis quando não se observar desvio superior a 15% do valor obtido das amostras recém-preparadas, com exceção do LIQ, para o qual se aceita desvio de até 20%. Qualquer que seja o método estatístico utilizado para avaliar os resultados dos estudos de estabilidade, este deverá estar descrito claramente no procedimento operacional padrão (POP).

#### Crítérios de aplicação do método bioanalítico validado

A análise de todas as amostras de um analito em matriz biológica deve ser concluída dentro do período de tempo para o qual a estabilidade tenha sido determinada.

Uma corrida analítica deve conter: amostras de CQ, padrões de calibração e amostras desconhecidas de um ou mais voluntários do estudo. É preferível que todas as amostras de um mesmo voluntário sejam analisadas numa única corrida.

Não é permitido estimar a concentração das amostras através da extrapolação da curva de calibração abaixo do LIQ ou acima do maior padrão. Em vez disso, a curva deve ser redefinida ou as amostras de concentrações superiores devem ser diluídas e reanalisadas.

No uso rotineiro do método analítico validado, sua precisão e exatidão devem ser monitoradas regularmente para assegurar a continuidade do desempenho satisfatório. Para atingir este objetivo, amostras de CQ devem ser analisadas juntamente com as demais amostras, em cada corrida analítica.

As amostras de CQ devem ser incorporadas em intervalos adequados, dependendo do número total de amostras da corrida, sempre em igual número de replicatas de cada concentração (CQB, CQM e CQA).

O número de amostras de CQ (em múltiplos de três) a ser incorporado em cada corrida analítica não deve ser inferior a 5% (cinco por cento) do número de amostras desconhecidas. Para corridas analíticas constituídas de até 120 amostras, pelo menos 6 (seis) CQs (uma duplicata de cada concentração) devem estar presentes.

Os resultados das amostras de CQ servirão de base para aceitação ou rejeição da corrida analítica. No mínimo, 67% (quatro de seis) das amostras de CQ devem estar dentro de mais ou menos 15% dos seus respectivos valores nominais, exceto para o LIQ, para o qual se

Limite desvios menores ou iguais a 20%; 33% (duas de seis) amostras de CQ podem estar fora destes limites, mas não para a mesma concentração.

Caso seja feita referência a uma validação de método utilizado para um estudo anterior, os seguintes pré-requisitos deverão ser observados:

O método analítico só será aceito caso tenha sido empregado pela última vez há não mais do que seis meses. Se o método analítico foi empregado pela última vez há mais de seis meses, uma validação de pré-estudo totalmente nova do método deverá ser realizada. Se o método analítico vem sendo empregado continuamente durante os meses anteriores a este estudo, não será necessária nenhuma validação adicional.

#### **14.2 CONTROLE DE QUALIDADE DURANTE A ANÁLISE DE ROTINA DA DRUGA E CURVAS DE CALIBRAÇÃO**

Uma curva de calibração será gerada para cada analito. Um número suficiente de pontos deverá ser usado para definir adequadamente a relação entre concentração e resposta. O número de pontos usados na construção da curva de calibração será uma função da faixa dos valores analíticos e da natureza da relação analito-resposta. As concentrações dos pontos devem ser escolhidas baseadas na faixa de concentrações esperada do estudo. A curva de calibração deve consistir de uma amostra em branco, uma amostra zero e de 6 (seis) a 8 (oito) pontos que cubram a faixa esperada, incluindo o LOQ. As curvas serão determinadas separadamente para cada lote de amostras e pertencerão exclusivamente a esta corrida.

Devem ser incorporados a cada corrida amostras de Controle de Qualidade num mínimo de 3 (três) concentrações (1 dentro de  $3 \times \text{LOQ}$  - CQ de baixa concentração), 1 (um) no meio da faixa (CQ de concentração média) e 1 (um) no final da faixa (CQ de concentração alta). Os resultados das amostras de CQ fornecem a base de aceitação e rejeição de uma corrida. Um mínimo de 67% (4/6) dos CQs devem estar dentro de  $\pm 15\%$  do seu respectivo valor nominal; 33% dos CQs (não todas as replicatas na mesma concentração) podem estar fora de  $\pm 15\%$  do valor nominal. O número total de amostras deve ser ao menos 5% do número de amostras desconhecidas ou 6 CQs totais (o que for maior).

#### **14.3 ANÁLISE DAS AMOSTRAS DO ESTUDO**

Serão ocultadas aos analistas, durante as medições analíticas, informações sobre o tratamento dispensado aos voluntários, bem como não lhes será dado acesso à lista de autorização dos mesmos.

As amostras serão analisadas como medições individuais.

Após a análise de 10 amostras de voluntários deverão ser incluídos CQ's a fim de se certificar da precisão e exatidão do método.

Amostras com concentrações acima do LSQ serão reanalisadas após diluição (ver item 14.1).

Observações relativas a amostras hemolisadas ou lipêmicas serão documentadas e relacionadas no relatório analítico.

Estado: SFPI29/08\_Isomazida

Documento: Protocolo

Versão: Final

Data: 30 de Setembro de 2008

#### 14.4 OUTLIERS E REPETIÇÃO DE ANÁLISE

Amostras com valores aberrantes que possam ser atribuídos a erros de processamento ou falha de equipamento, assim como procedimentos totais com muitos CQs fora da tolerância pré-definida, serão reanalisadas (contanto que haja suficiente disponibilidade de plasma). Os resultados iniciais serão documentados, mas não relatados.

Se um resultado exceder o mais alto nível da curva de calibração, a amostra será re-analisada após diluição com a matriz (branco), empregando-se um procedimento validado. Os resultados iniciais serão documentados, mas não relatados.

Os resultados analíticos serão revistos pelo Investigador Principal. Ele decidirá sobre reanálises, baseado em considerações farmacocinéticas. Porém, quando a causa for devido a alguma ocorrência na etapa analítica, caberá ao responsável pela etapa analítica requisitar as reanálises.

#### 14.5. QUANTIFICAÇÃO DAS AMOSTRAS

A quantificação das amostras será, em princípio, realizada através da técnica de Cromatografia Líquida acoplada à Espectrometria de Massas em Sequência, e será precedida por uma validação pré-estudo.

#### 14.6. TRATAMENTO E DOCUMENTAÇÃO DE DADOS BIOANALÍTICOS

Todos os valores medidos serão inseridos em planilhas *EXCEL* e documentados de forma impressa e em arquivos eletrônicos de dados. Os dados brutos das medições analíticas serão documentados sob a forma de arquivos eletrônicos de modo a permitir a identificação retrospectiva dos valores individuais medidos e a identificação dos valores integrados automática e manualmente, respectivamente. Quando houver sido realizada reintegração manual para a determinação dos valores analíticos, os valores originais obtidos por integração automática deverão ser documentados em arquivos no formato de PDF.

Os resultados (concentrações plasmáticas) obtidos, assim como as demais informações relacionadas ao procedimento serão objeto do Relatório Analítico a ser elaborado, por ocasião da conclusão do estudo.

### 15. ANÁLISE FARMACOCINÉTICA

A análise farmacocinética será realizada com o apoio dos seguintes softwares:

- ✓ EquivTest, versão 2.0;
- ✓ Microsoft Excel, versão 97;
- ✓ R2.2

Serão apresentadas, também, as seguintes informações:



- Para cada voluntário, gráfico *concentração vs. tempo*, em escala linear, para cada formulação e os respectivos parâmetros farmacocinéticos.
- Para o conjunto dos voluntários, gráfico *concentração vs. tempo*, em escala linear, para cada formulação, juntamente com as seguintes estatísticas: média aritmética, desvio padrão (ou mediana e amplitude, conforme apropriado). Outras estatísticas poderão ser apresentadas se necessário.

## 15.1 PARÂMETROS FARMACOCINÉTICOS

Os seguintes parâmetros serão determinados:

f) Cálculo de:

|                         |                                                                                                                                                                                                                                                                                                            |
|-------------------------|------------------------------------------------------------------------------------------------------------------------------------------------------------------------------------------------------------------------------------------------------------------------------------------------------------|
| ASC <sub>[0-last]</sub> | Área sob a curva de <i>concentração vs. tempo</i> , do tempo 0 (zero) ao tempo da última concentração observada acima do limite de quantificação calculada pelos métodos dos trapézios.                                                                                                                    |
| ASC <sub>[0-∞]</sub>    | Área sob a curva de <i>concentração da droga versus tempo</i> do tempo 0 (zero) extrapolada ao infinito, calculada como $ASC_{[0-∞]} = ASC_{[0-t]} + C_t/K_e$ , em que $C_t$ é a última concentração determinada acima do limite de quantificação.                                                         |
| $K_e$                   | Constante de Eliminação de Primeira Ordem, estimada pelo coeficiente angular da reta de regressão, calculada pelo método dos mínimos quadrados, do logaritmo natural da <i>concentração vs. tempo</i> para os últimos quatro valores de concentração (ou no mínimo três) acima do limite de quantificação. |
| $T_{1/2}$               | Meia-vida, calculada como $\ln(2) / K_e$ .                                                                                                                                                                                                                                                                 |

h) Determinação de:

|           |                                                                                                                             |
|-----------|-----------------------------------------------------------------------------------------------------------------------------|
| $C_{max}$ | Maior concentração alcançada, com base nos dados experimentais, obtida diretamente na curva <i>concentração vs. tempo</i> . |
| $T_{max}$ | Tempo no qual ocorre o $C_{max}$ .                                                                                          |

## 15.2 DESCRIÇÃO DOS CRITÉRIOS E MÉTODOS ESTATÍSTICOS

Será empregada análise de variância apropriada para o modelo de 2 períodos cruzados, sob os dados de ASC e  $C_{max}$  transformados logaritmicamente, a qual levará em conta em seu modelo os efeitos de seqüência, paciente dentro da seqüência, tratamento e período.

A flutuação do fármaco teste será avaliada por comparação com a flutuação do fármaco referência.

A verificação de existência de efeito residual será realizada com base nos testes de seqüência da ANOVA, utilizando-se como parâmetro o P valor obtido com base na F<sub>seq</sub> do efeito de seqüência (Sequence Hypothesis of model effects).

Serão calculados os pontos paramétricos e estimativas dos intervalos da razão T/R (formulação "teste" / formulação "referência") para os valores de ASC e  $C_{max}$  de cada formulação Teste. A biodisponibilidade relativa de cada formulação Teste versus Referência será avaliada pelas razões das médias geométricas (pontos estimados). O intervalo de confiança de 90% servirá como estimativa do intervalo e será determinado por análises paramétricas (dois testes t unilaterais – p=0.05).

Dois medicamentos serão considerados bioequivalentes se os valores extremos do intervalo de confiança de 90% da razão das médias geométricas (ASC t (teste)/ASC0-t referência e  $C_{max}$ teste/ $C_{max}$ referência) forem maiores que 0,8 e menores que 1,25. Outros limites de IC de 90% para  $C_{max}$  previamente estabelecidos no protocolo, poderão ser aceitos mediante justificativas científicas. Quando clinicamente relevante,  $T_{max}$  deverá também ser considerado (RDC no. 1170, de 19/04/06 ANVISA-MS).

A análise realizada com o emprego dos seguintes programas de computador: EquivTest Versão 2.0; R2.2 e Microsoft Excel Versão 7.0.

A entrada de dados e seu processamento inicial se darão através de arquivos MS Excel, com base nos dados derivados dos equipamentos de análise. Os dados brutos bem como os resultados das avaliações farmacocinéticas e estatísticas ficarão disponíveis em papel e em meio eletrônico.

### 15.3. SELEÇÃO DOS VOLUNTÁRIOS A SEREM INCLUÍDOS NA ANÁLISE

Serão inicialmente incluídos na análise todos os voluntários que vierem a completar todos os períodos do estudo.

A verificação da presença de possíveis pontos atípicos (outliers) será feita através da análise de Box-plots, que fornece informações sobre posição, dispersão, assimetria e valores discrepantes.

Poderão ser excluídos voluntários que apresentem comportamento discrepante em relação aos demais voluntários, no que se refere aos parâmetros farmacocinéticos, ou ainda aqueles em que a quantificação das amostras claramente apresentem problemas suficientemente expressivos que impeçam a comparação entre as formulações. As exclusões deverão ser documentadas e justificadas no Relatório Final e ambos os resultados (com e sem as exclusões) serão apresentados no relatório final. Voluntários não serão excluídos da análise por razões exclusivamente matemáticas ou estatísticas.

## 16. CONTROLE DE QUALIDADE E GARANTIA DE QUALIDADE

O controle de qualidade inclui todas as atividades realizadas durante e após a realização do estudo. As atividades e técnicos empregadas estarão de acordo com os procedimentos definidos pelas instituições envolvidas em cada etapa (clínica, analítica e estatística), de comum acordo com o patrocinador, cabendo a cada uma a responsabilidade final pela qualidade de suas correspondentes atividades.

Qualquer desvio do plano deste protocolo deverá ser descrito e justificado, submetido à aprovação do CEP e apresentado no Relatório Final.

#### **17. ACESSO DIRETO AOS DOCUMENTOS/DADOS FONTE**

O Investigador Principal, e as instituições envolvidas se comprometem a permitir a realização de atividades de monitoração por parte do patrocinador ou seu proposto; auditorias oficiais, revisão por parte do Comitê de Ética em Pesquisa e inspeção pelos órgãos governamentais envolvidos, proporcionando, caso seja necessário, o acesso aos dados brutos, única e exclusivamente para fins relacionados ao estudo.

Não obstante, este direito de acesso implica a ausência dos envolvidos aos aspectos de confidencialidade dos dados. As informações assim obtidas somente poderão ser utilizadas para os fins diretos das atividades que estiverem sendo exercidas, mantendo-se mesmo assim o sigilo quanto à identidade dos voluntários.

Caso qualquer das autoridades envolvidas não estiver obrigada por lei a manter os dados em sigilo, não será permitido que estas tenham acesso a qualquer documento onde os dados de identificação do voluntário estejam disponíveis.

#### **18. POLÍTICA DE PUBLICAÇÃO DOS DADOS**

Toda a informação não publicada relacionada a este protocolo é de propriedade do Instituto e Tecnologia em Fármacos - Farmanguinhos. Nenhuma informação não publicada pode ser divulgada sem a aprovação por escrito do Instituto de Tecnologia em Fármacos - Farmanguinhos.

#### **19. CRITÉRIOS DE ACEITAÇÃO DE DESVIOS DE PROTOCOLO**

Todos os procedimentos relativos ao estudo serão checados pela Unidade de Garantia da Qualidade da Synchrophar e da Unidade de Análise das Amostras de forma que sejam cumpridos de acordo com o descrito no protocolo.

Caso haja algum desvio de protocolo, este será julgado pelo Investigador Principal que decidirá se o impacto deste no estudo é significativo ou não.

Todos os desvios serão devidamente registrados nos relatórios pertinentes.

## 20. RELATÓRIOS

O Relatório Clínico será enviado com os Formulários de Relato de Caso (CRFs).  
Os relatórios Analítico, Estatístico e Final, serão fornecidos de acordo com os contratos firmados entre as partes envolvidas.

## 21. ANEXOS

- 01 - Lista de Aleatorização
- 02 - Dieta
- 03 - Termo de Recrutamento
- 04 - Termo de Consentimento Livre e Esclarecido
- 05 - Folha de Eventos Adversos
- 06 -- Eventos Adversos Relacionados ao Sistema Digestório.
- 07 - Esquema de Estudo
- 08 - Amostra de retenção - Inventário
- 09 - POP EC pro10- Processamento, Armazenamento, Transporte e envio das Amostras.

**PÁGINA DE ASSINATURAS**

**TÍTULO DO PROTOCOLO:** “Estudo clínico de farmacocinética de duas formulações de Isoniazida em voluntários sadios de ambos os sexos: Isoniazida comprimido de 300 mg (Teste) produzido pelo Instituto de Tecnologia e Fármacos – Farmanguinhos e Isoniazida-LAQFA® (R comprimidos de 100 mg (Referência) produzido pelo Laboratório Químico Farmacêutico da Aeronáutica”.

Li este Projeto, seu Protocolo Experimental e o Termo de Consentimento Livre e Esclarecido e concordo em conduzir este estudo em conformidade com o estipulado pelo Protocolo, pelas Resoluções nº 196/96 e 251/97 do Conselho Nacional de Saúde - Ministério da Saúde, pelas recomendações da ICH de Boas Práticas Clínicas, e de acordo com a Declaração de Helsinki (1965) e as revisões de Tóquio (1975), Veneza (1983), África do Sul (1996) e Escócia (2000).

| Investigadores                 | Assinaturas |
|--------------------------------|-------------|
| Dr. Eduardo Wemecck Barroso    |             |
| Dr. André Bastos Daher         |             |
| Dr. Ney Carter do Carmo Borges |             |
| Dr. Ronilson Agnaldo Moreno    |             |
| Drª Marlice A Sfpoli Marques   |             |
| Msc. Luciana da Rocha Pitta    |             |

## Anexo 1

### ALEATORIZAÇÃO DOS MEDICAMENTOS

“Estudo clínico de farmacocinética de duas formulações de Isoniazida em voluntários sadios de ambos os sexos: Isoniazida comprimido de 300 mg (Teste) produzido pelo Instituto de Tecnologia e Fármacos – Farmanguinhos e Isoniazida-LAQFA® 03 comprimidos de 100 mg (Referência) produzido pelo Laboratório Químico Farmacêutico da Aeronáutica.”

| Seqüência de Administrações |      |           |           |
|-----------------------------|------|-----------|-----------|
| Voluntário                  | Sexo | Período 1 | Período 2 |
| 1                           | M    | T         | R         |
| 2                           | F    | R         | T         |
| 3                           | M    | R         | T         |
| 4                           | M    | T         | R         |
| 5                           | M    | R         | T         |
| 6                           | F    | T         | R         |
| 7                           | M    | R         | T         |
| 8                           | F    | T         | R         |
| 9                           | M    | R         | T         |
| 10                          | F    | T         | R         |
| 11                          | M    | T         | R         |
| 12                          | F    | R         | T         |
| 13                          | F    | T         | R         |
| 14                          | F    | R         | T         |
| 15                          | M    | R         | T         |
| 16                          | M    | R         | T         |
| 17                          | F    | T         | R         |
| 18                          | F    | R         | T         |
| 19                          | M    | R         | T         |

|    |   |   |   |
|----|---|---|---|
| 20 | F | T | R |
| 21 | F | F | R |
| 22 | M | T | R |
| 23 | F | R | T |
| 24 | F | R | T |
| 25 | M | T | R |
| 26 | M | I | R |
| 27 | F | T | R |
| 28 | M | R | T |

## **Anexo 02**

### **REFEIÇÕES**

Dieta geral isenta de xantina em torno de 2500 a 2700 Kcal que corresponde a 4 refeições (jantar na noite da internação, almoço, lanche da tarde e jantar no dia da alta hospitalar)

#### **JANTAR**

arroz

feijão

01 porção de legume ou verdura refogada

01 porção de salada

01 porção de carne

01 sobremesa (fruta ou doce)

#### **ALMOÇO**

arroz

feijão

01 porção de legume ou verdura refogada

01 porção de salada

01 porção de carne

01 sobremesa (fruta ou doce)

#### **LANCHE DA TARDE**

Pão c/manteiga, iogurte, fruta.

#### **JANTAR**

arroz

feijão

01 porção de legume ou verdura refogada

01 porção de salada

01 porção de carne

01 sobremesa (fruta ou doce)



## ANEXO 3

### TERMO DE RECRUTAMENTO

Você está sendo convidado a participar de um processo de recrutamento de voluntários para um projeto de pesquisa clínica. Sua participação é importante, porém, você não deve participar contra a sua vontade.

A sua participação neste processo de recrutamento tem como objetivo avaliar suas condições de saúde para possível participação em um projeto de pesquisa clínica.

Após participar da palestra informativa e realizar o cadastro de dados pessoais, você será encaminhado para consulta de enfermagem, a fim de se obter assinatura do Termo de Recrutamento (Anexo 3) em duas vias (uma via é fornecida ao voluntário e a outra arquivada em sua documentação), e realização da consulta de enfermagem (história clínica, dados antropométricos, sinais vitais e teste de hemoglobinometria). Em posse do resultado do teste de hemoglobinometria, dados antropométricos e sinais vitais, segundo o critério de inclusão do estudo, será definido pelo prosseguimento do voluntário no processo de recrutamento, considerando apto ou inapto, se for considerado inapto, este recebe as orientações pertinentes e se necessário será encaminhado para o serviço de saúde. Os voluntários aptos, serão encaminhados para consulta médica para realização do exame físico e anamênese. Caso o voluntário seja considerado apto será encaminhado para fazer exames laboratoriais, segundo Resolução RE nº 894, de 29 de maio de 2003 (Hemograma, bioquímica, teste de gravidez (BHC) para as mulheres e sorologia para HIV, Hepatite B e C) e exames complementares, caso contrário o voluntário receberá as orientações pertinentes e se necessário será encaminhado para o serviço de saúde. Após o recebimento e avaliação dos resultados dos exames laboratoriais e complementares, o médico avaliará a aptidão do voluntário para participação no estudo ou, em caso contrário, receberá orientações pertinentes e se necessário será encaminhado para o serviço de saúde.

Se necessário serão realizados exames para a detecção de drogas de abuso (cannabis, cocaína, benzodiazepínicos, opiáceos, anfetaminas).

Você tem a liberdade de desistir ou interromper a participação no processo no momento que desejar, sem necessidade de qualquer explicação que influencie em sua vida pessoal e que esta desistência não implicará em qualquer penalidade.

Os resultados obtidos durante o processo serão mantidos em sigilo, e a Synchrophar não identificará você por ocasião da exposição e/ou publicação dos mesmos. Você receberá todas as informações sobre os resultados dos exames e orientações sobre qualquer anormalidade.

Caso esteja sob tratamento médico no momento, ou esteja fazendo uso de quaisquer drogas ou medicações, ou tenha participado de qualquer outro ensaio clínico no período de 180 dias antes da assinatura deste termo de seleção prévia, você não poderá ser recrutado.

Caso tenha doado ou perdido 450 mL ou mais de sangue dentro dos quatro meses, ou perdido mais de 1500 mL dentro dos 12 meses antes da data de avaliação, você não poderá ser recrutado.

Caso seja selecionado para participar do estudo, você fará uma nova entrevista antes da internação quando serão fornecidos os detalhes do estudo. Neste caso, você deverá assinar um outro termo denominado termo de consentimento livre e esclarecido antes da administração da medicação.

Eu, \_\_\_\_\_, nascido em \_\_\_\_\_ / \_\_\_\_ / \_\_\_\_\_, RG \_\_\_\_\_, após ter lido as orientações acima, declaro que é de livre e espontânea vontade que estou participando como voluntário de um processo de recrutamento para um projeto de pesquisa clínica na Synchrophar, sob responsabilidade do Pesquisador Principal Dr. Eduardo Werneck Barroso, dos Responsáveis pela Etapa Clínica Dr. Ney Carter do Carmo Borges e Dr. Ronilson Agnaldo Moreno e das Enfermeiras Responsáveis da Synchrophar Assessoria e Desenvolvimento de Projetos Clínicos S/S Ltda.

Campinas, \_\_\_\_ de \_\_\_\_\_ de 200\_\_.

Assinatura do voluntário

Assinatura da enfermagem

Assinatura de testemunha

(Necessário somente se o voluntário não souber ler)

"Estudo clínico de farmacocinética de duas formulações de Isoniazida em voluntários saudáveis de ambos os sexos: Isoniazida comprimido de 300 mg (Teste) produzido pelo Instituto de Tecnologia e Fármacos – Farmanguinhos e Isoniazida-LAQFA<sup>®</sup> 03 comprimidos de 100 mg (Referência) produzido pelo Laboratório Químico Farmacêutico da Aeronáutica"

## TERMO DE CONSENTIMENTO LIVRE E ESCLARECIDO

Você está sendo convidado a participar de um projeto de pesquisa. Sua participação é importante, porém, você não deve participar contra a sua vontade.

Leia atentamente as informações abaixo e faça qualquer pergunta que desejar, para que todos os procedimentos desta pesquisa sejam esclarecidos.

Responsáveis: Dr. Eduardo Werneck Barros, Dr. Ney Carter do Carmo Borges e Dr. Ronilson Agualdo Moreno

## INFORMAÇÃO BÁSICA SOBRE A MEDICAÇÃO

Isoniazida é um medicamento que produz efeito antibacteriano. É um fármaco utilizado para o tratamento de tuberculose (TBC) e associada com outros antituberculosos no tratamento da TBC, meningite tuberculosa, infecções micobacterianas atípicas.

## PROPÓSITO DO ESTUDO

O objetivo deste estudo é avaliar se a formulação de Isoniazida - comprimido de 300 mg produzido pelo Instituto de Tecnologia em Fármacos - Farmanguinhos - *produto teste* - atinge níveis plasmáticos equivalentes aos da formulação de Isoniazida-LAQFA<sup>®</sup> 03 comprimidos de 100 mg - *produto referência* - produzido pelo Laboratório Químico Farmacêutico da Aeronáutica, você receberá 01 comprimido do medicamento teste e 03 comprimidos do medicamento referência de cada uma das duas medicações, cada uma em um período de internação diferente. A ordem que você tomará cada medicação obedecerá a um sorteio realizado por computador (randomização).

## PROCEDIMENTOS A SEREM REALIZADOS E RESPONSABILIDADES

Antes de sua participação no estudo e após a sua participação você será convidado a ir a Synchronphar para avaliar a sua condição de saúde.

Após participar da palestra informativa e realizar o cadastro de dados pessoais, você será encaminhado para consulta de enfermagem, a fim de se obter assinatura do Termo de Recrutamento (Anexo 3) em duas vias (uma via é fornecida ao voluntário e a outra arquivada em sua documentação), e realização da consulta de enfermagem (história clínica, dados antropométricos, sinais vitais e teste de hemoglobinometria). Em posse do resultado do teste de hemoglobinometria, dados antropométricos e sinais vitais, segundo o critério de inclusão do estudo, será definido pelo prosseguimento do voluntário no processo de recrutamento, considerando apto ou inapto, se for considerado inapto, este recebe as orientações pertinentes e se necessário será encaminhado para o serviço de saúde. Os voluntários aptos, serão encaminhados para consulta médica para realização do exame físico e anamnese. Caso o voluntário seja considerado apto será encaminhado para fazer exames laboratoriais, segundo Resolução RE nº 894, de 29 de

maio de 2003 (Hemograma, bioquímica, teste de gravidez (βHCG) para as mulheres e sorologia para HIV, Hepatite B e C) e exames complementares, caso contrário o voluntário receberá as orientações pertinentes e se necessário será encaminhado para o serviço de saúde. Após o recebimento e avaliação dos resultados dos exames laboratoriais e complementares, o médico avaliará a aptidão do voluntário para participação no estudo ou, em caso contrário, receberá orientações pertinentes e se necessário será encaminhado para o serviço de saúde.

No dia de sua internação no Hospital Irmãos Pentecostes você passará por um outro exame clínico e de enfermagem no qual serão verificados seu pulso, sua temperatura e sua pressão. Caso você seja mulher, deverá fazer um exame de detecção de gravidez βHCG (na urina).

Você não poderá levar consigo alimentos e bebidas e nem outros objetos que não sejam de uso pessoal (roupas íntimas, xampu, condicionador, sabonete). Você terá seus pertences revistados para checar que você está cumprindo o que foi estabelecido neste parágrafo.

Ao chegar no Hospital, você será encaminhado para um quarto, onde será realizado o jantar e depois dormirá. Você deverá ficar no quarto não podendo circular pelo Hospital. Durante o estudo, você será internado 2 vezes por aproximadamente 24 horas cada período, com intervalo mínimo de 07 dias. Todas as internações serão realizadas da mesma maneira, inclusive com o mesmo cardápio.

Em cada período de internação a) Você deverá permanecer em jejum por pelo menos 08 horas antes da medicação, b) será puncionada uma veia em seu braço que deverá ficar até o final da internação, c) será retirada uma amostra de 15 mL de sangue antes da administração da medicação, d) será administrado 01 comprimido de Isoniazida de 300 mg e 3 comprimidos de Isoniazida-LAQFA<sup>®</sup> de 100 mg acompanhado de 200 mL de água sem gás, e) serão coletadas 32 amostras (16 amostras em cada período) de sangue de 7,5 mL cada, através de agulha que foi colocada na veia do seu braço, f) em intervalos regulares será verificada sua pressão, pulso e temperatura, g) serão servidas refeições padronizadas (jantar na noite da internação, almoço, lanche da tarde e jantar no dia da alta hospitalar) e bebidas em horários preestabelecidos, h) após a coleta de 12 horas você receberá alta do hospital, i) você deverá retornar à Synchrophar para as coletas de amostras correspondentes ao tempo de 24 horas após a administração do medicamento.

Um total de 300 mL de sangue serão colhidos durante todo o estudo. A duração total de sua participação na pesquisa está estimada em 30 dias, a contar da primeira internação, após o processo de seleção.

## RESPONSABILIDADES DO VOLUNTÁRIO

É condição indispensável, para participação no estudo, que você esteja em boas condições de saúde e, portanto, não esteja no momento sob tratamento médico ou fazendo uso de quaisquer drogas ou medicações e não poderá ter doado sangue nos últimos 4 meses. Você também não poderá ter participado de qualquer estudo clínico que envolva medicamento pelo menos nos últimos 6 meses.

Você não poderá:

- a) 24 horas que antecedem a administração pretendida da droga até a última coleta de sangue: ingerir bebidas alcoólicas.

- b) 24 horas antes da primeira coleta de sangue até o exame de acompanhamento; praticar exercícios físicos muito intensos;
- c) 12 horas que antecedem a administração da medicação até a última coleta de sangue; tomar bebidas contendo cafeína e xantinas, como por exemplo, café, chá, coca-cola, chocolate. Em caso de necessidade, perguntar para os responsáveis pelos telefones que se encontram no final deste termo.

É ainda de sua responsabilidade em relação à sua participação no ensaio clínico: a) comparecer às internações na data e horários informados, b) tomar toda a medicação prevista, c) ingerir toda a alimentação e líquidos previstos, d) retornar à unidade na data e horários combinados para a realização da consulta e exames de alta, independentemente de haver sido interrompida sua participação no estudo ou de sua desistência.

Caso você seja mulher, é condição indispensável para participação no ensaio clínico que você não esteja grávida. Isso será comprovado por exame de gravidez no sangue ( $\beta$ HCG) e por exames feitos através da urina (urolita) antes de cada uma das internações. Sua participação não será permitida caso você engravidar após a realização dos exames clínico-laboratoriais, se você estiver amamentando ou se estiver pretendendo engravidar durante o prazo de duração do estudo. Caso, mesmo tendo considerado estas precauções, vier a suspeitar que engravidou durante a participação no estudo, deverá comunicar imediatamente o fato à equipe e deverá interromper sua participação sem prejuízo dos seus direitos.

## RESPONSABILIDADES DA SYNCIROPHAR

É de responsabilidade do nosso investigador garantir que você receba um tratamento definitivo para qualquer evento adverso (eventos não programados que afetam a saúde), se necessário. Os eventos adversos deverão ser seguidos clinicamente e por análises laboratoriais (quando indicados) até que os resultados dos exames voltem ao normal. Estas atividades podem permanecer mesmo após o estudo ter sido completado.

A equipe da Synchrophar irá monitorar a sua segurança clínica desde a ocorrência de um evento adverso até a recuperação satisfatória.

Em casos de emergência o Hospital de Internação estará dando todo o suporte que você precisar.

## POSSÍVEIS RISCOS E DESCONFORTOS

A administração oral de Isoniazida pode causar efeitos colaterais como: Diversas anemias, agranulocitose, trombocitopenia e eosinofilia. Menos de 1% dos pacientes apresentam reações cutâneas, incluindo urticária, púrpura, lúpus eritematoso e dermatite exfoliativa.

Neuropatia periférica é o efeito tóxico mais comum. Outros efeitos neurotóxicos incomum com doses convencionais são: convulsões, encefalopatia tóxica, neurite, prejuízo de memória, e psicose tóxica.

Efeitos hepáticos como elevação das Transaminases (SGOT; SGPT), bilirrubinemia, bilirrubinúria, icterícia ocasionalmente severo e às vezes hepatite fatal. Também foram relatadas agranulocitose, eosinofilia, trombocitopenia, anemia hemolítica, sideroblástica ou aplástica.

Outros efeitos adversos incluem: náuseas, vômito, boca seca, constipação, febre, vertigem, vasculite, hiperreflexia, retenção de urina e Ginecomastia.

Além dos efeitos citados, a administração de qualquer medicamento pode causar reações imprevisíveis.

A retirada de sangue é um procedimento seguro. Pode causar um leve desconforto devido à picada da agulha e ocasionalmente, uma mancha roxa pequena no local da picada.

### **BENEFÍCIOS OU COMPENSAÇÕES**

A participação neste estudo, não tem o objetivo de submetê-lo a um tratamento terapêutico. Conseqüentemente, não se espera que a participação no estudo traga qualquer benefício em função do tratamento.

### **INTERCORRÊNCIAS (efeitos indesejáveis)**

Se você sofrer algum malefício em decorrência direta de sua participação no estudo, você receberá tratamento, sem qualquer custo. Não haverá, no entanto qualquer compensação de ordem financeira em função do ocorrido, a não ser que a condição faça jus à indenização prevista no Seguro de Vida em Grupo mencionado abaixo. Contudo, ao assinar este termo, você não está renunciando qualquer direito legal que você possui. Durante o período de 180 dias a partir da data da assinatura deste termo, você estará assegurado pelo Seguro de Vida em Grupo da Menzger S/A Seguros e Previdência.

### **RESSARCIMENTO**

Você será ressarcido no valor de R\$ 440,00 (Quatrocentos e quarenta reais) para as despesas e tempo despendido para a realização deste estudo. A sua desistência ou dispensa antes do comparecimento para a primeira internação não dá direito a ressarcimento. Caso desista em uma das internações e/ou não compareça as coletas externas, você será excluído do estudo e o ressarcimento não será efetuado (Resolução 1170 item 3.1.3). Caso seja dispensado antes do estudo ser finalizado, você receberá no final do estudo, o valor proporcional ao tempo despendido. O ressarcimento será efetuado após a consulta de alta. Caso você não compareça no dia da alta, será realizado 03 contatos. Se você não comparecer nas datas agendadas, seu processo será finalizado, e seu ressarcimento cancelado.

Estima-se que durante o período de sua participação no estudo você terá como despesa apenas os gastos de deslocamento da sua residência ou trabalho até a Synchrophar para a realização dos exames e consultas. O transporte da Synchrophar até o Hospital Irmãos Pentecoste será providenciado pela Synchrophar. Ainda devem ser previstas eventuais visitas posteriores para acompanhamento dos eventos adversos. O ressarcimento destas despesas já está incluído no valor estabelecido no item acima.

### **PARTICIPAÇÃO VOLUNTÁRIA**

Sua participação é voluntária e você tem a liberdade de desistir ou interromper a participação neste estudo no momento que desejar. Neste caso, você deve informar imediatamente sua decisão ao pesquisador ou a um membro de sua equipe, sem



documento denominado Termo de Consentimento Livre e Esclarecido e que tive oportunidade de fazer perguntas sobre o seu conteúdo e também sobre o Estudo. Recebi explicações que responderam por completo minhas dúvidas e realmente estou livre e espontaneamente decidido participar do Estudo, sob responsabilidade do Dr. Eduardo Werneck Barroso, Dr. Ney Carter do Carmo Borges, do Dr. Ronilson A. Moreno e das Enfermeiras Responsáveis da Synchrophar Assessoria e Desenvolvimento de Projetos Clínicos S/S Ltda.

Ao assinar este Termo de Consentimento eu também estou certificando que toda a informação que eu prestei, incluindo minha história médica, é verdadeira e correta até onde é de meu conhecimento, e declaro estar recebendo uma cópia assinada deste documento.

Ao assinar este Termo de Consentimento estou autorizando o acesso às minhas informações de saúde aos membros da equipe e a monitores, auditores, membros do Comitê de Ética em Pesquisa e membros de órgãos regulamentares envolvidos, nas condições descritas acima.

Ao assinar este Termo de Consentimento eu não renunciei qualquer direito legal que eu venha a ter ao participar deste Estudo.

|                                     |                                                                   |
|-------------------------------------|-------------------------------------------------------------------|
| <input checked="" type="checkbox"/> | Nome do Voluntário                                                |
|                                     | Data: ____/____/____                                              |
| <input checked="" type="checkbox"/> | Assinatura                                                        |
| <input checked="" type="checkbox"/> | Responsável pela obtenção do termo de consentimento               |
|                                     | Data: ____/____/____                                              |
| <input checked="" type="checkbox"/> | Testemunha<br>(Necessário somente se o voluntário não souber ler) |
|                                     | Data: ____/____/____                                              |

#### CONTATOS:

Dr. Eduardo Werneck Barroso

Dr. Ney Carter do Carmo Borges

Dr. Ronilson Agnaldo Moreno





Anexo 6

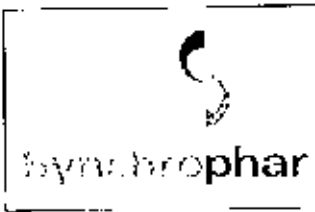

Estudo: Isoniazida comprimido de 300 mg

Protocolo: SPH - 029/08

SYNCHROPHAR ASSESSORIA E DESENVOLVIMENTO DE PROJETOS CLÍNICOS S/R LTDA

Número do Voluntário: \_\_\_\_\_

Identificação: \_\_\_\_\_

**Eventos Relacionados ao Sistema Digestório**

Período de avaliação do I max Previsto ( ) \_\_\_\_\_

Você teve náusea? ( ) Sim ( ) Não EA#: \_\_\_\_\_  
 ( ) Sim ( ) Moderada ( ) Leve Hora: \_\_\_\_\_  
 Obs.: \_\_\_\_\_

Você teve vômito? ( ) Sim ( ) Não EA#: \_\_\_\_\_  
 Característica: ( ) Goulhoso ( ) Pastoso ( ) Líquido Hora: \_\_\_\_\_  
 Quantidade em ml. \_\_\_\_\_ Cor: \_\_\_\_\_  
 Frequência: \_\_\_\_\_ vezes  
 Obs.: \_\_\_\_\_

Você teve dor abdominal? ( ) Sim ( ) Não EA#: \_\_\_\_\_  
 ( ) Intensa ( ) Moderada ( ) Leve Hora: \_\_\_\_\_  
 Obs.: \_\_\_\_\_

Você teve aumento do volume abdominal? ( ) Sim ( ) Não EA#: \_\_\_\_\_  
 Hora: \_\_\_\_\_  
 Obs.: \_\_\_\_\_

Você teve flatulência? ( ) Sim ( ) Não EA#: \_\_\_\_\_  
 Frequente? ( ) Sim ( ) Não Hora: \_\_\_\_\_  
 Obs.: \_\_\_\_\_

Você teve eructação? ( ) Sim ( ) Não EA#: \_\_\_\_\_  
 Frequente? ( ) Sim ( ) Não Hora: \_\_\_\_\_  
 Obs.: \_\_\_\_\_

Médico Responsável

Assinatura

Data e Hora do Exame

Hospital

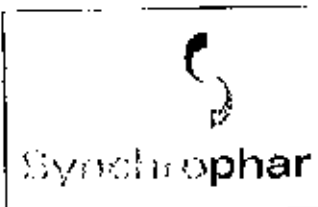

Anexo 6

Estudo: Isoniazida comprimido de 300 mg

Protocolo: SPH - 029/08

SYNCHROPHAR ACESSORIA E DESENVOLVIMENTO DE PROJETOS CLÍNICOS S/S LTDA

Número do Voluntário: \_\_\_\_\_

Identificação: \_\_\_\_\_

|                                     |              |              |             |             |
|-------------------------------------|--------------|--------------|-------------|-------------|
| Você percebeu alteração no paladar? | ( ) Sim      | ( ) Não      | EA#:        | _____       |
| Descrição: _____                    |              |              | Hora:       | _____       |
| Você percebeu alteração nas fezes?  | ( ) Sim      | ( ) Não      | EA#:        | _____       |
| Frequência:                         | ( ) Aumentou | ( ) Diminuiu | Hora:       | _____       |
| Característica:                     | ( ) Sólida   | ( ) Pastosa  | ( ) Líquida |             |
| Quantidade:                         | ( ) Grande   | ( ) Média    | ( ) Pequena |             |
| Cor:                                | _____        |              |             |             |
| Obs.:                               | _____        |              |             |             |
| Você teve azia/queimação?           | ( ) Sim      | ( ) Não      | EA#:        | _____       |
|                                     | ( ) Intensa  | ( ) Moderada | ( ) Leve    | Hora: _____ |
| Obs.:                               | _____        |              |             |             |
| Você teve alteração na salivação?   | ( ) Sim      | ( ) Não      | EA#:        | _____       |
|                                     | ( ) Intensa  | ( ) Moderada | ( ) Leve    | Hora: _____ |
| Obs.:                               | _____        |              |             |             |

\_\_\_\_\_  
Médico Responsável

\_\_\_\_\_  
Assinatura

\_\_\_\_\_  
Data e Hora do Exame

Hospital: \_\_\_\_\_





**ANEXO 08**

**AMOSTRA DE RETENÇÃO - INVENTÁRIO**

**AMOSTRAS FORMULAÇÃO REFERÊNCIA**

Declaro para os devidos fins que utilizamos para a realização do estudo de biodisponibilidade a seguinte medicação.

|                           |  |
|---------------------------|--|
| <b>Nome:</b>              |  |
| <b>Fabricante:</b>        |  |
| <b>Princípio Ativo:</b>   |  |
| <b>Forma:</b>             |  |
| <b>Concentração:</b>      |  |
| <b>Lote Nº:</b>           |  |
| <b>Fabricação:</b>        |  |
| <b>Validade:</b>          |  |
| <b>Quantidade:</b>        |  |
| <b>Total:</b>             |  |
| <b>Cond. de estocagem</b> |  |

Distribuição da medicação:

|                              |  |
|------------------------------|--|
| <b>Amostras de retenção:</b> |  |
| <b>Amostras utilizadas:</b>  |  |
| <b>Amostras perdidas</b>     |  |
| <b>TOTAL:</b>                |  |

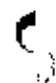

Synchrophar

## AMOSTRAS FORMULAÇÃO TESTE

Declaro para os devidos fins que utilizamos para a realização do estudo de biodisponibilidade a seguinte medicação.

Nome:  
Fabricante:  
Princípio Ativo:  
Forma:  
Concentração:  
Lote Nº:  
Fabricação:  
Validade:  
Quantidade:  
Totais:  
Cond. de Estocagem:

Distribuição da medicação:

|                       |  |
|-----------------------|--|
| Amostras de retenção: |  |
| Amostras utilizadas:  |  |
| Amostras perdidas     |  |
| TOTAL:                |  |

Declaro também que as amostras de retenção (Referência e Teste) estão armazenadas em armário próprio, com temperatura e umidade controladas pela coordenadora de estudos clínicos na Synchrophar Assessoria e Desenvolvimento de Projetos Clínicos S/S Ltda situada na Rua Candido Gomide nº 38 Campinas, à disposição para inspeção.

|                                                                                                         |                            |                                    |
|---------------------------------------------------------------------------------------------------------|----------------------------|------------------------------------|
| <br><b>Synchrophar</b> |                            |                                    |
| Etapa Clínica                                                                                           |                            | Data operacionalização: 03/09/2007 |
|                                                                                                         |                            | Versão: 02                         |
| POP EC pro 10                                                                                           | Validade:<br>setembro/2008 | Página 1 de 12                     |
| Processamento, Armazenamento, Transporte e Envio das Amostras                                           |                            |                                    |

## 1. OBJETIVO

Estabelecer padronização para os seguintes procedimentos: processamento, armazenamento, transporte e envio das amostras de plasma.

## 2. ABRANGÊNCIA

Equipe de centrifugação e motorista habilitado para transporte de amostras.

## 3. POPs RELACIONADOS – versões vigentes

POP EC pro 09 – Coleta de Amostras de Sangue dos Voluntários.

## 4. LEGISLAÇÕES

Este POP segue o disposto na resolução: RDC no. 302 de 13 de outubro de 2005, além de boas práticas internacionais.

## 5. RESPONSABILIDADES

Equipe de centrifugação: responsável pelo processamento e armazenamento das amostras de sangue.

Motorista habilitado: realizar o transporte de amostras da unidade de internação para a unidade clínica e desta para a unidade analítica quando necessário.



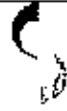

## Synchrophar

|                                                               |                            |                                    |
|---------------------------------------------------------------|----------------------------|------------------------------------|
| Etapa Clínica                                                 |                            | Data operacionalização: 03/09/2007 |
|                                                               |                            | Versão: 02                         |
| POP EC pro 10                                                 | Validade:<br>setembro/2008 | Página 2 de 12                     |
| Processamento, Armazenamento, Transporte e Envio das Amostras |                            |                                    |

### 6. PROCEDIMENTOS

#### 6.1 Centrifugação:

- O responsável pela centrifugação deve separar os tubos com sangue por tempo de coleta e leva-los à centrífuga, verificando o balanceamento adequado para o bom funcionamento do aparelho. Em seguida o material é centrifugado conforme estabelecido pelo protocolo de estudo;
- Utilizando uma pipeta Pasteur e/ou pontelras descartáveis, transferir o plasma do tubo centrifugado para dois tubos criogênicos, com tampa tipo rosca ou rolha, de vedação segura. As etiquetas destes tubos devem ser iguais;
- Os tubos de coleta com refugo são descartados no lixo infectante;
- Levar os tubos para o freezer e armazenar nas estantes reservadas para recebê-los. Temperatura do freezer conforme protocolo;
- Em seguida devem ser anotadas a hora de entrada das amostras no freezer e a temperatura no formulário identificado por "Tabela de Controle de Entrada de Amostras no Freezer" (ANEXO1);
- Para amostras hemolisadas, deve-se preencher o ANEXO 2 de acordo com o grau de hemólise apresentada.



# Synchrophar

Etapa Clínica

Data operacionalização: 03/09/2007

Versão: 02

POP EC pro 10

Validade:  
setembro/2008

Página 3 de 12

Processamento, Armazenamento, Transporte e Envio das Amostras

## 6.2 Preparação e Transporte:

- Os tubos de criogênico dos voluntários são organizados e colocados em sacos plásticos individuais (um para cada voluntário) ou em caixas com no máximo quatro voluntários por caixa, referentes ao período de internação;
- Os tubos devem ser apresentados na ordem crescente de tempo de coleta por internação. Dentro do saco plástico é colocado um papel cartão, recortado no tamanho do conjunto de tubos. Este tem como função manter os tubos na ordem, dando firmeza ao pacote que está sendo confeccionado. Em seguida, o saco plástico é selado ao redor dos tubos apoiados no papel cartão;
- No caso das caixas, os tubos de criogênico também se apresentam na ordem crescente de tempo de coleta e na tampa consta a identificação do voluntário, conforme abaixo;
- As embalagens de amostras de todos os voluntários, do mesmo estudo, identificados com o nome da droga, código do voluntário, SPH, fase, e data e são guardados juntos. Ao final de cada internação, as amostras congeladas são encaminhadas para a Synchrophar em caixas térmicas contendo gelo reciclável ou gelo seco e termômetro apropriado para o monitoramento da temperatura. As amostras permanecerão nos freezers da empresa (temperatura conforme protocolo) até o seu envio para o laboratório onde será realizada a etapa analítica do estudo.
- A faixa de temperatura dos freezers convencionais é de  $-10^{\circ}\text{C}$  a  $-40^{\circ}\text{C}$  e, do freezer de alta refrigeração é de  $-65^{\circ}\text{C}$  e  $-85^{\circ}\text{C}$ .

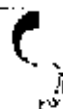

## Synchrophar

|                                                               |                            |                                    |
|---------------------------------------------------------------|----------------------------|------------------------------------|
| Etapa Clínica                                                 |                            | Data operacionalização: 03/09/2007 |
|                                                               |                            | Versão: 02                         |
| POP EC pro 10                                                 | Validade:<br>setembro/2008 | Página 4 de 12                     |
| Processamento, Armazenamento, Transporte e Envio das Amostras |                            |                                    |

### 6.3 Envio:

O responsável pelo envio das amostras ao laboratório analítico deve:

- Acondicionar os pacotes de tubos de amostras (todas as fauces) de um estudo em uma caixa térmica, identificada na parte frontal com uma etiqueta contendo o nome da droga, código do voluntário, SPI, fase, e data do estudo, protegida com fita adesiva transparente;
- Fazer a conferência de todas as amostras que serão enviadas e colocar no Comunicado de Remessa de Amostras (ANEXO 3) a razão pela qual qualquer amostra não seja enviada (drop out, erro operacional, etc);
- A conferência deve ser feita por, no mínimo, duas pessoas em momentos diferentes e os dados cruzados; caso não estejam iguais a conferência é refeita. Após esta conferência e sanada as diferenças, as amostras podem ser enviadas;
- Sobre os tubos das amostras deve ser colocado gelo seco e um termômetro digital ou sensor do mesmo, onde são registradas a temperatura máxima e a temperatura mínima atingidas. O termômetro deve acompanhar as amostras durante o procedimento de envio destas ao laboratório analítico;
- Enviar a caixa térmica ao laboratório acompanhada de um Comunicado de Remessa de Amostra em 3 vias (ANEXO 3). Uma via deve permanecer na Synchrophar, 2 seguem para o laboratório analítico,

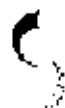

## Synchrophar

|                                                               |                            |                                    |
|---------------------------------------------------------------|----------------------------|------------------------------------|
| Etapa Clínica                                                 |                            | Data operacionalização: 03/09/2007 |
|                                                               |                            | Versão: 02                         |
| POP EC pro 10                                                 | Validade:<br>setembro/2008 | Página 5 de 12                     |
| Processamento, Armazenamento, Transporte e Envio das Amostras |                            |                                    |

sendo que 1 retorna protocolada. As 2 vias da Synchrophar devem ser arquivadas.

A pessoa responsável pela remessa das amostras deve certificar-se de que as amostras chegaram ao laboratório e foram entregues em horário que garanta a presença de responsáveis pelo recebimento.

### 6.4 Retirada do material:

Quando as amostras são retiradas por um funcionário do laboratório analítico:

As amostras poderão ser retiradas da empresa por um funcionário do laboratório onde será conduzida a etapa analítica. No momento da retirada, este funcionário, junto com o técnico da Synchrophar, responsável pelo envio das amostras, deve:

- Checar o material;
- Preencher e assinar a folha do Comunicado de Remessa de Amostra (ANEXO 3) em 3 vias. Uma via fica na empresa e 2 seguem para o laboratório junto com as amostras.

Na chegada do material ao laboratório analítico, um funcionário deve:

- Checar a temperatura marcada no termômetro que acompanha as amostras;
- Checar as condições das amostras;
- Preencher os campos adequados e assinar as duas vias de remessa que seguirão com a caixa;
- Encaminhar uma das vias para a Synchrophar.



## Synchrophar

|                                                               |                            |                                    |
|---------------------------------------------------------------|----------------------------|------------------------------------|
| Etapa Clínica                                                 |                            | Data operacionalização: 03/09/2007 |
|                                                               |                            | Versão: 02                         |
| POP EC pro 10                                                 | Validade:<br>setembro/2008 | Página 6 de 12                     |
| Processamento, Armazenamento, Transporte e Envio das Amostras |                            |                                    |

A via do Comunicado de Remessa de Amostras que retorna à Synchrophar é arquivada.

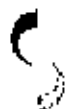

## Synchronophar

|                                                               |                            |                                    |  |
|---------------------------------------------------------------|----------------------------|------------------------------------|--|
| Etapa Clínica                                                 |                            | Data operacionalização: 03/09/2007 |  |
|                                                               |                            | Versão: 02                         |  |
| POP EC pro 10                                                 | Validade:<br>setembro/2008 | Página 7 de 12                     |  |
| Processamento, Armazenamento, Transporte e Envio das Amostras |                            |                                    |  |

### CONTROLE DE REVISÃO

| Data       | Versão | Revisor                     | Alteração                                                        |
|------------|--------|-----------------------------|------------------------------------------------------------------|
| 04/06/07   | 01     | Roberta G Lopes             | Alteração de cabeçalho e revisão no corpo do texto.              |
| 09/08/2007 | 02     | Cláudia Cristiana Domingues | Alteração de cabeçalho, atualização e revisão do corpo de texto. |

Aprovado por:

\_\_\_\_\_  
Dr. Ney Carter do Carmo Borges  
Diretor Clínico

\_\_\_\_\_  
Dr. Ronilson Agnaldo Moreno  
Diretor Técnico

Elaborado por:

Eduardo Orpinelli  
Coordenador do Centro

Revisado/Aprovado por:

Yara Del Antonio Tavelra  
Gerente da Qualidade



# Synchrophar

|                                                               |                                    |                |
|---------------------------------------------------------------|------------------------------------|----------------|
| Etapa Clínica                                                 | Data operacionalização: 03/09/2007 |                |
|                                                               | Versão: 02                         |                |
| POP EC pró 10                                                 | Validade:<br>setembro/2008         | Página 9 de 12 |
| Processamento, Armazenamento, Transporte e Envio das Amostras |                                    |                |

## ANEXO 2

### Tabela de Hemólises

The screenshot shows a software window titled 'Tabela de Hemólises'. It contains a table with the following columns: ID, Tipo de amostra, Data de coleta, Data de envio, and Data de recebimento. The table lists various sample IDs and their corresponding dates. The interface includes a menu bar at the top and a toolbar with icons for file operations and printing.

| ID  | Tipo de amostra | Data de coleta | Data de envio | Data de recebimento |
|-----|-----------------|----------------|---------------|---------------------|
| 001 | ...             | ...            | ...           | ...                 |
| 002 | ...             | ...            | ...           | ...                 |
| 003 | ...             | ...            | ...           | ...                 |
| 004 | ...             | ...            | ...           | ...                 |
| 005 | ...             | ...            | ...           | ...                 |
| 006 | ...             | ...            | ...           | ...                 |
| 007 | ...             | ...            | ...           | ...                 |
| 008 | ...             | ...            | ...           | ...                 |
| 009 | ...             | ...            | ...           | ...                 |
| 010 | ...             | ...            | ...           | ...                 |
| 011 | ...             | ...            | ...           | ...                 |
| 012 | ...             | ...            | ...           | ...                 |
| 013 | ...             | ...            | ...           | ...                 |
| 014 | ...             | ...            | ...           | ...                 |
| 015 | ...             | ...            | ...           | ...                 |
| 016 | ...             | ...            | ...           | ...                 |
| 017 | ...             | ...            | ...           | ...                 |
| 018 | ...             | ...            | ...           | ...                 |
| 019 | ...             | ...            | ...           | ...                 |
| 020 | ...             | ...            | ...           | ...                 |
| 021 | ...             | ...            | ...           | ...                 |
| 022 | ...             | ...            | ...           | ...                 |
| 023 | ...             | ...            | ...           | ...                 |
| 024 | ...             | ...            | ...           | ...                 |
| 025 | ...             | ...            | ...           | ...                 |
| 026 | ...             | ...            | ...           | ...                 |
| 027 | ...             | ...            | ...           | ...                 |
| 028 | ...             | ...            | ...           | ...                 |
| 029 | ...             | ...            | ...           | ...                 |
| 030 | ...             | ...            | ...           | ...                 |
| 031 | ...             | ...            | ...           | ...                 |
| 032 | ...             | ...            | ...           | ...                 |
| 033 | ...             | ...            | ...           | ...                 |
| 034 | ...             | ...            | ...           | ...                 |
| 035 | ...             | ...            | ...           | ...                 |
| 036 | ...             | ...            | ...           | ...                 |
| 037 | ...             | ...            | ...           | ...                 |
| 038 | ...             | ...            | ...           | ...                 |
| 039 | ...             | ...            | ...           | ...                 |
| 040 | ...             | ...            | ...           | ...                 |
| 041 | ...             | ...            | ...           | ...                 |
| 042 | ...             | ...            | ...           | ...                 |
| 043 | ...             | ...            | ...           | ...                 |
| 044 | ...             | ...            | ...           | ...                 |
| 045 | ...             | ...            | ...           | ...                 |
| 046 | ...             | ...            | ...           | ...                 |
| 047 | ...             | ...            | ...           | ...                 |
| 048 | ...             | ...            | ...           | ...                 |
| 049 | ...             | ...            | ...           | ...                 |
| 050 | ...             | ...            | ...           | ...                 |

### Diferentes graus de hemólise

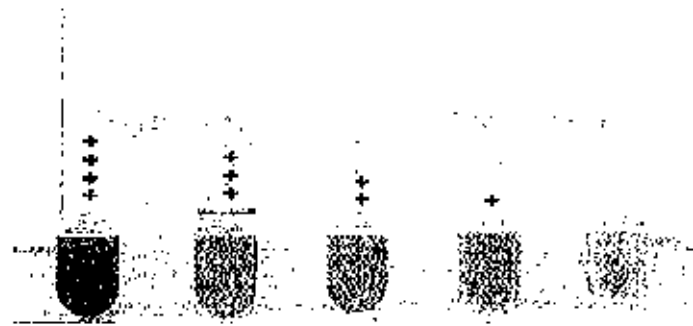



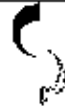

# Synchronphar

|                                                               |                            |                                    |
|---------------------------------------------------------------|----------------------------|------------------------------------|
| Etapa Clínica                                                 |                            | Data operacionalização: 03/09/2007 |
|                                                               |                            | Versão: 02                         |
| POP EC pro 10                                                 | Validade:<br>setembro/2008 | Página 10 de 12                    |
| Processamento, Armazenamento, Transporte e Envio das Amostras |                            |                                    |

## ANEXO 3

### COMUNICADO DE REMESSA DE AMOSTRAS AO LABORATÓRIO ANALÍTICO

Comunicamos que estamos enviando amostras para a realização da Etapa Analítica, de acordo com o procedimento operacional padrão da Synchronphar, cujos dados seguem abaixo:

|                                                                  |  |                  |
|------------------------------------------------------------------|--|------------------|
| Título do Estudo:                                                |  |                  |
| Droga utilizada no estudo:                                       |  | Código: SPH      |
| Matriz Biológica: Plasma                                         |  | Volume: > 1,0 ml |
| Número total de amostras <u>previstas</u> no estudo:             |  | FASE:            |
| Número total de <u>amostras coletadas / enviadas</u> :           |  |                  |
| <b>Número total de <u>amostras perdidas / não coletadas</u>:</b> |  |                  |
| Número de voluntários <i>incluídos</i> no estudo:                |  | MASC:            |
|                                                                  |  | FEM:             |
| Número de voluntários que <i>concluíram</i> o estudo:            |  |                  |
| Houve voluntários Drop out, se sim especificar: ( ) Sim ( ) Não  |  |                  |



# Synchrophar

|               |                                    |                 |
|---------------|------------------------------------|-----------------|
| Etapa Clínica | Data operacionalização: 03/09/2007 |                 |
|               | Versão: 02                         |                 |
| POP EC pro 10 | Validado:<br>setembro/2006         | Página 11 de 12 |

Processamento, Armazenamento, Transporte e Envio das Amostras

Descrição de amostras não coletadas / Não enviadas:

Tubos de POOL:

Volume:

Observações:

Tubos criogênicos com tampa vermelha - Fase I  
Tubos criogênicos com tampa azul - Fase II  
Tubos criogênicos com tampa branca - Fase III.

RETIRADA DA SYNCHROPHAR:

Data:

Hora:

Transportado em:  GELO SECO  GELO COMUM

Temperatura: DATA LOGGER Nº

Responsável pelo transporte das amostras:

Nome:

Assinatura:

RECEBIMENTO:

Data:

Hora:

Conferido:  sim  não Temperatura: DATA LOGGER

Responsável pelo recebimento das amostras:

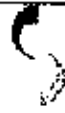

# Synchronophar

|                                                               |                            |                                    |  |
|---------------------------------------------------------------|----------------------------|------------------------------------|--|
| Etapa Clínica                                                 |                            | Data operacionalização: 03/09/2007 |  |
|                                                               |                            | Versão: 02                         |  |
| POP EC pro 10                                                 | Validade:<br>setembro/2008 | Página 12 de 12                    |  |
| Processamento, Armazenamento, Transporte e Envio das Amostras |                            |                                    |  |

Nome:

Assinatura:

- ✓ OBS 1: O responsável pelo transporte também se responsabiliza pelo termômetro digital que acompanha o recipiente térmico.
- ✓ OBS 2: Após o preenchimento das informações de recebimento das amostras, enviar a segunda via original para SYNCHROPHAR.
- ✓ OBS 3: Após a geração do relatório de temperatura do Data Logger, será encaminhado ao laboratório analítico uma cópia.
